# Supplementary material for: Describing the public perception of chemistry on twitter
Source: Royal Society of Chemistry journal article supplement (doi:10.1039/c9rp00282k), 2020-01-01
Supplement: c9rp00282k1.pdf [file c9rp00282k1.pdf]

# **Describing the Public Perception of Chemistry on Twitter**

## **Electronic Supplementary Information (ESI)**

Manuel Guerris,<sup>\*a</sup> Jordi Cuadros,<sup>\*a</sup> Lucinio González-Sabaté<sup>a</sup> and Vanessa Serrano<sup>a</sup>

---

<sup>\*</sup> Corresponding authors

<sup>a</sup> IQS Univ. Ramon Llull, Via Augusta 390, 08017 Barcelona, Spain, +34 932672000. E-mail: [manuel.guerris@iqs.url.edu](mailto:manuel.guerris@iqs.url.edu),  
[jordi.cuadros@iqs.url.edu](mailto:jordi.cuadros@iqs.url.edu)

## **Electronic Supplementary Information (ESI)**

|                                                                                                           |           |
|-----------------------------------------------------------------------------------------------------------|-----------|
| <b>ESI 1: L-method and curvature method results .....</b>                                                 | <b>3</b>  |
| <b>ESI 2: Clusters graphical representation.....</b>                                                      | <b>6</b>  |
| <b>ESI 3: BIBD cluster number assigned to each expert and classification<br/>results per expert .....</b> | <b>13</b> |
| <b>ESI 4: Classification of the tweets sample from the learning environment<br/>topic .....</b>           | <b>18</b> |

## **Appendix 1: L-method and curvature method results**

L-method for elbow graph

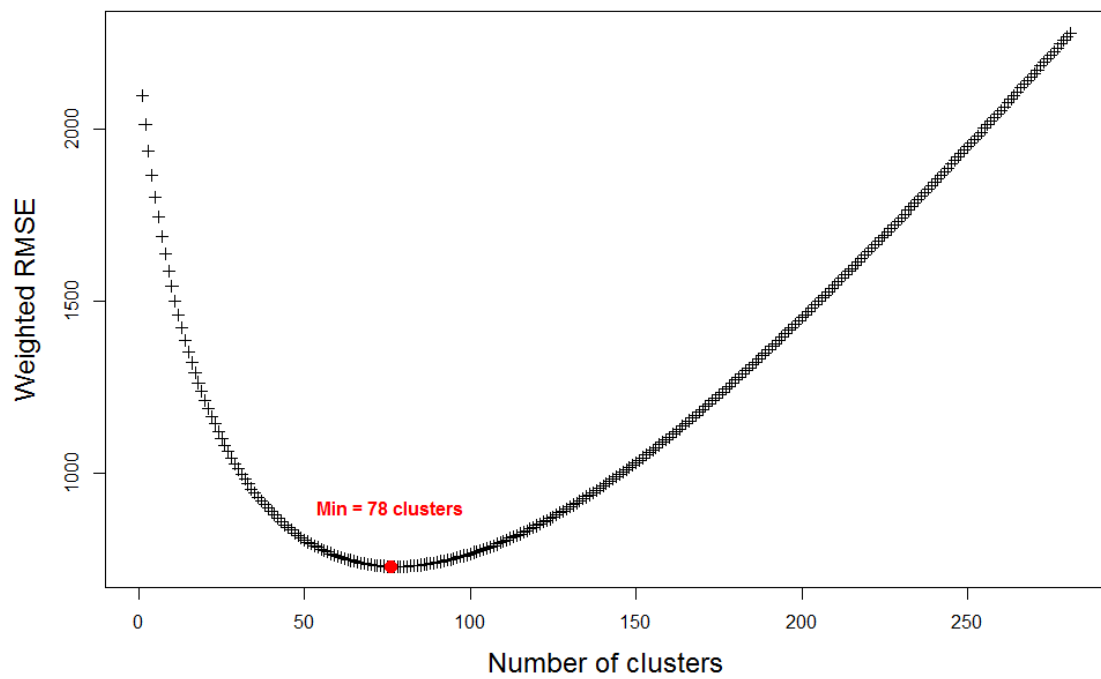

L-method for silhouette graph

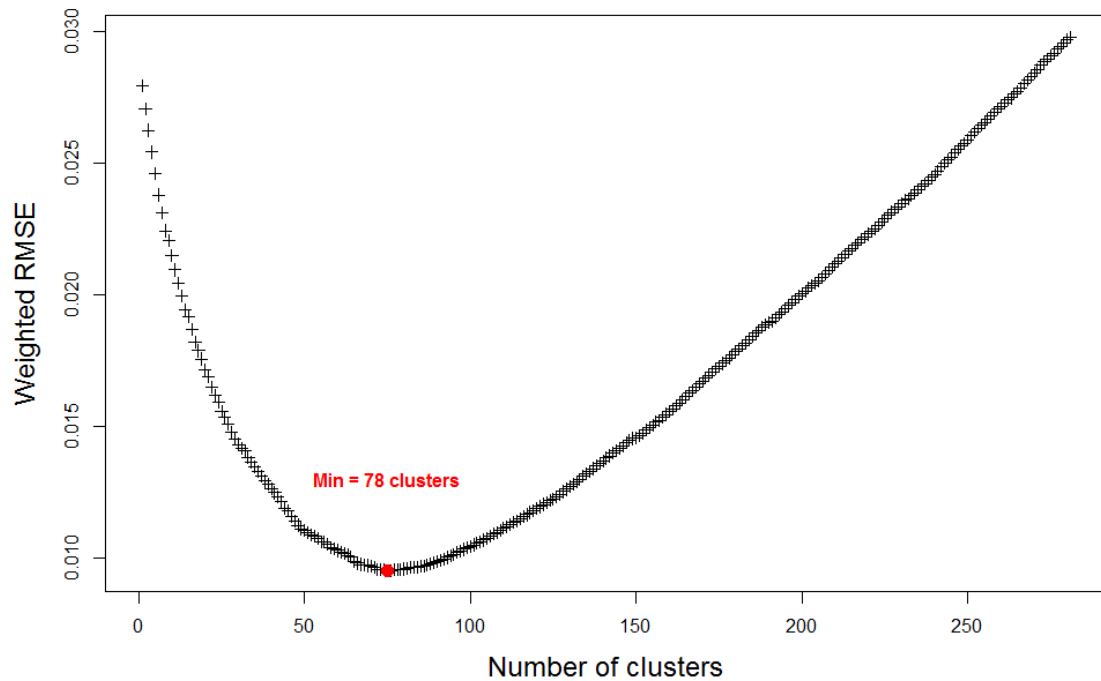

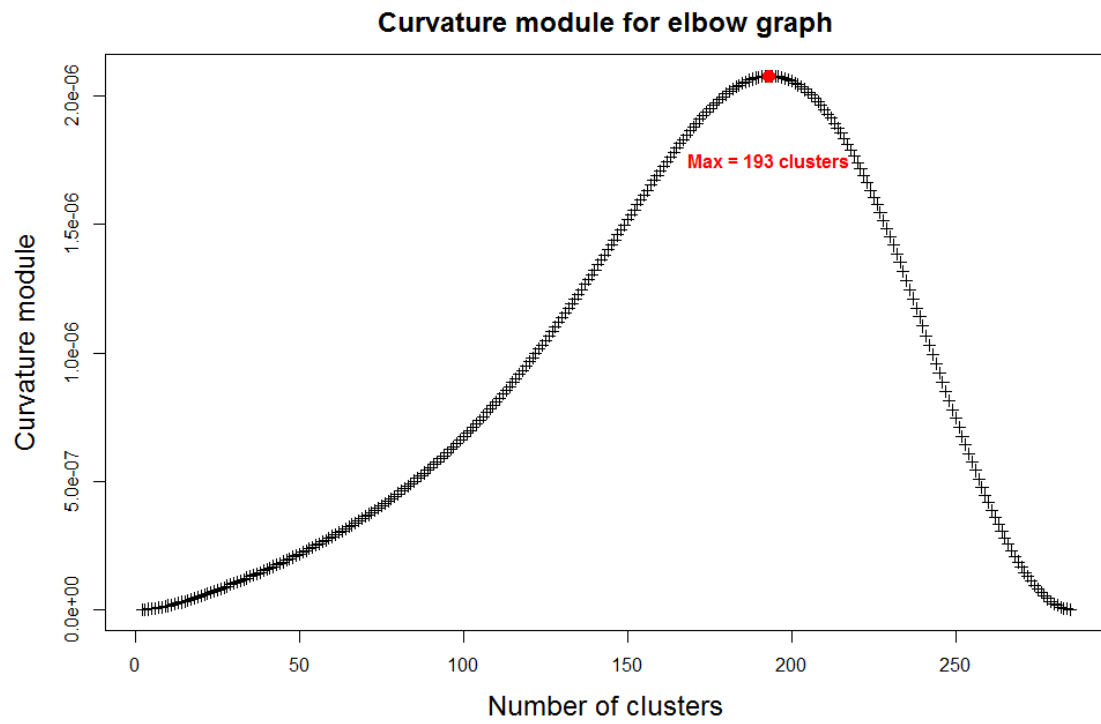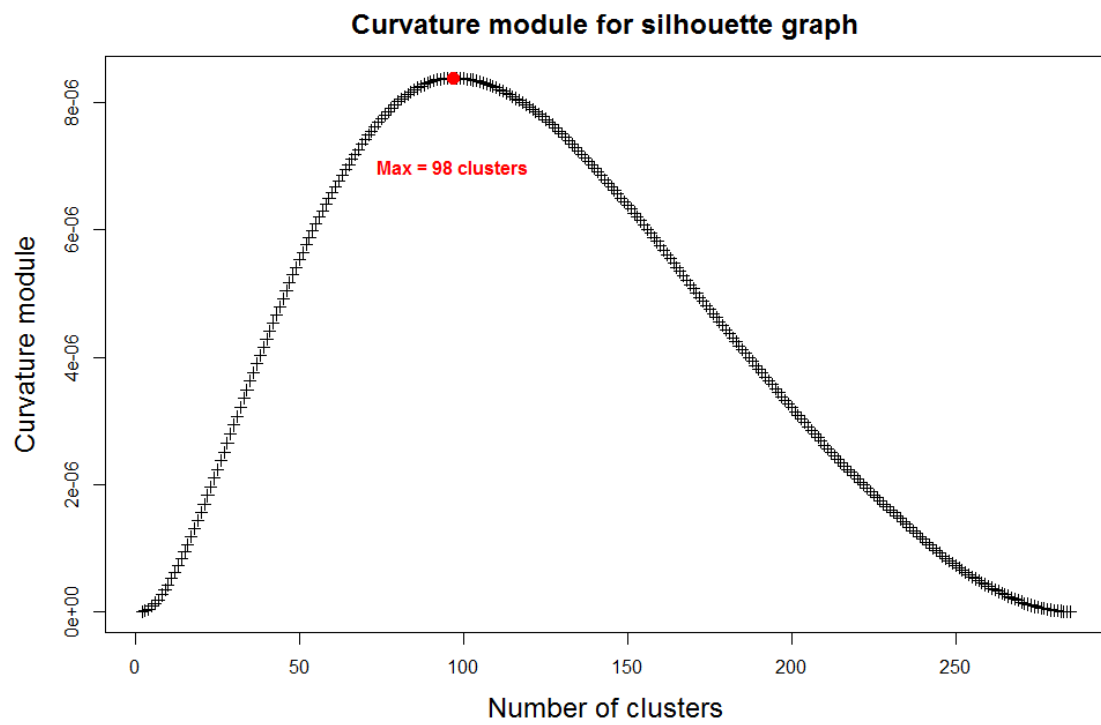

## **ESI 2: Examples of clusters graphical representation**

Clusters number 35, 27, 9, 74, 96 and 71. Classified in the topics Human Activity (HA), Scientific Knowledge (SK), Learning Environment (LE), Entertainment (E), Human Relationships (HR) and Undefined (U) respectively.

Cluster 35 Number of tweets = 1282 35/100

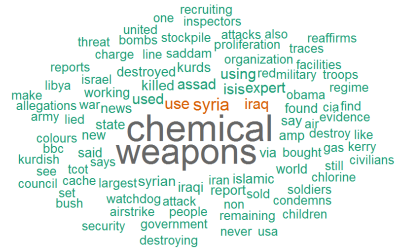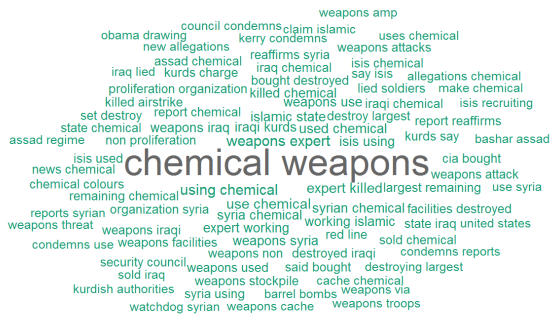

Cluster 27 Number of tweets = 912 27/100

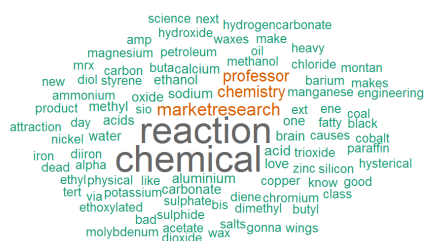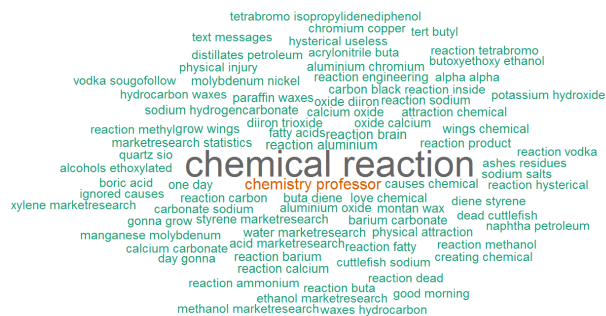



Cluster 9 Number of tweets = 511 9/100

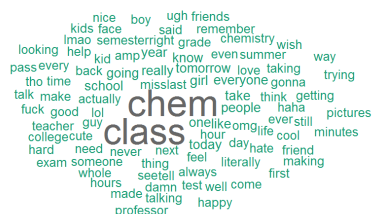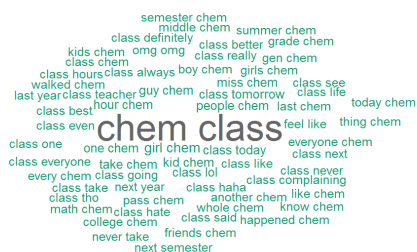

Cluster 74 Number of tweets = 271 74/100

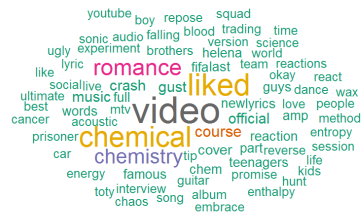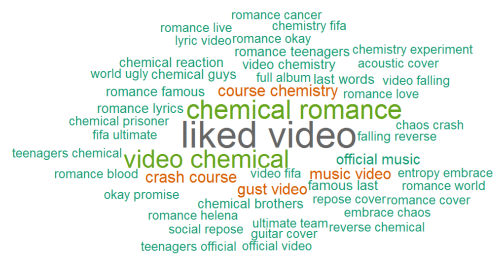

Cluster 96 Number of tweets = 541 96/100

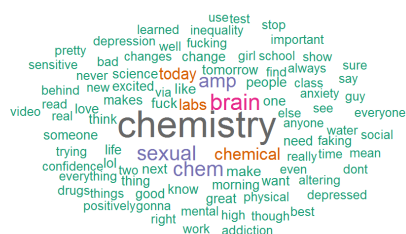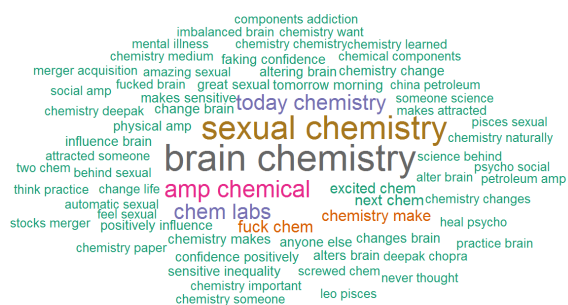

Cluster 71 Number of tweets = 451 71/100

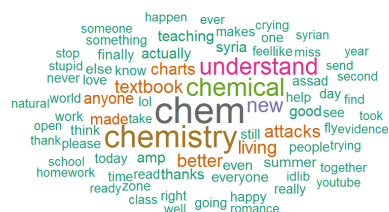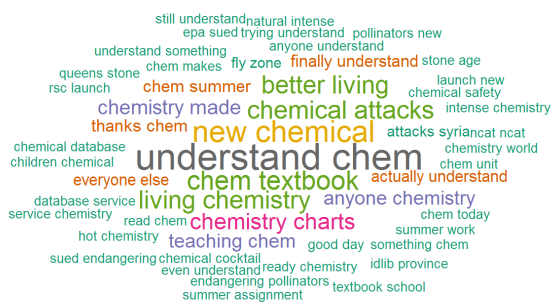

**ESI 3: BIBD cluster number assigned to each expert and classification  
results per expert**

## BIBD cluster number assigned to each expert.

Coloured checked mark cells represent the clusters assigned to each group of three experts.

For instance, cluster number 4 was assigned to experts 2, 8, 14; 4, 10, 16 and 6, 12, 18

| Expert  | 123456       |   |   |   |   |   | 123456       |    |   |   |   |   | 123456       |    |    |   |   |   | 123456       |   |    |     |   |   |   |   |  |
|---------|--------------|---|---|---|---|---|--------------|----|---|---|---|---|--------------|----|----|---|---|---|--------------|---|----|-----|---|---|---|---|--|
|         | 789101112    |   |   |   |   |   | 789101112    |    |   |   |   |   | 789101112    |    |    |   |   |   | 789101112    |   |    |     |   |   |   |   |  |
|         | 131415161718 |   |   |   |   |   | 131415161718 |    |   |   |   |   | 131415161718 |    |    |   |   |   | 131415161718 |   |    |     |   |   |   |   |  |
| Cluster | 1            | ✓ |   | ✓ |   | ✓ | 26           | ✓  |   |   | ✓ |   | ✓            | 51 | ✓  |   | ✓ |   | ✓            |   | 76 | ✓   |   |   | ✓ | ✓ |  |
|         | 2            | ✓ |   | ✓ |   | ✓ | 27           | ✓  |   |   | ✓ |   | ✓            | 52 | ✓  |   | ✓ |   | ✓            |   | 77 | ✓   |   |   | ✓ | ✓ |  |
|         | 3            | ✓ |   | ✓ |   | ✓ | 28           | ✓  |   |   | ✓ |   | ✓            | 53 | ✓  |   | ✓ |   | ✓            |   | 78 | ✓   | ✓ | ✓ |   |   |  |
|         | 4            | ✓ |   | ✓ |   | ✓ | 29           | ✓  |   |   | ✓ |   | ✓            | 54 | ✓  |   | ✓ |   | ✓            |   | 79 | ✓   | ✓ |   | ✓ |   |  |
|         | 5            | ✓ |   | ✓ |   | ✓ | 30           | ✓  |   | ✓ |   |   | ✓            | 55 | ✓  |   | ✓ |   | ✓            |   | 80 | ✓   | ✓ |   | ✓ |   |  |
|         | 6            | ✓ |   | ✓ |   | ✓ | 31           | ✓  |   |   | ✓ |   | ✓            | 56 |    | ✓ |   | ✓ | ✓            |   | 81 | ✓   | ✓ |   | ✓ |   |  |
|         | 7            | ✓ |   | ✓ |   | ✓ | 32           | ✓  |   |   | ✓ |   | ✓            | 57 |    | ✓ |   | ✓ | ✓            |   | 82 | ✓   | ✓ |   | ✓ |   |  |
|         | 8            |   |   | ✓ |   | ✓ | ✓            |    |   | ✓ | ✓ |   | ✓            | 58 |    | ✓ | ✓ | ✓ |              |   | 83 | ✓   | ✓ |   | ✓ |   |  |
|         | 9            |   | ✓ |   | ✓ |   | ✓            | 34 | ✓ |   |   | ✓ |              | ✓  | 59 |   | ✓ | ✓ | ✓            |   |    | 84  | ✓ | ✓ |   | ✓ |  |
|         | 10           |   |   | ✓ |   | ✓ | ✓            | 35 |   |   | ✓ | ✓ |              | ✓  | 60 | ✓ | ✓ | ✓ |              |   | ✓  | 85  | ✓ | ✓ |   | ✓ |  |
|         | 11           |   |   | ✓ | ✓ |   | ✓            | 36 |   |   | ✓ | ✓ |              | ✓  | 61 | ✓ | ✓ | ✓ |              |   | ✓  | 86  | ✓ | ✓ |   | ✓ |  |
|         | 12           | ✓ |   |   |   | ✓ | ✓            | 37 |   |   | ✓ | ✓ |              | ✓  | 62 | ✓ | ✓ | ✓ |              |   | ✓  | 87  | ✓ | ✓ |   | ✓ |  |
|         | 13           | ✓ |   | ✓ |   |   | ✓            | 38 |   |   | ✓ | ✓ |              | ✓  | 63 | ✓ |   | ✓ |              | ✓ | ✓  | 88  | ✓ | ✓ |   | ✓ |  |
|         | 14           | ✓ |   |   |   | ✓ | ✓            | 39 |   |   | ✓ | ✓ |              | ✓  | 64 | ✓ |   | ✓ |              | ✓ | ✓  | 89  | ✓ | ✓ |   | ✓ |  |
|         | 15           | ✓ |   |   | ✓ |   | ✓            | 40 |   |   | ✓ | ✓ |              | ✓  | 65 | ✓ | ✓ | ✓ |              |   | ✓  | 90  | ✓ | ✓ | ✓ |   |  |
|         | 16           | ✓ |   |   | ✓ |   | ✓            | 41 |   |   | ✓ | ✓ |              | ✓  | 66 | ✓ |   | ✓ |              | ✓ | ✓  | 91  | ✓ | ✓ |   | ✓ |  |
|         | 17           | ✓ |   |   | ✓ |   | ✓            | 42 |   |   | ✓ | ✓ |              | ✓  | 67 |   | ✓ | ✓ |              | ✓ | ✓  | 92  | ✓ | ✓ | ✓ |   |  |
|         | 18           | ✓ |   |   | ✓ |   | ✓            | 43 |   |   | ✓ | ✓ |              | ✓  | 68 |   | ✓ | ✓ |              | ✓ | ✓  | 93  | ✓ | ✓ |   | ✓ |  |
|         | 19           | ✓ |   |   |   | ✓ | ✓            | 44 |   |   | ✓ | ✓ |              | ✓  | 69 |   | ✓ |   | ✓            | ✓ | ✓  | 94  | ✓ | ✓ |   | ✓ |  |
|         | 20           | ✓ |   |   | ✓ |   | ✓            | 45 |   |   | ✓ | ✓ |              | ✓  | 70 |   | ✓ | ✓ |              | ✓ | ✓  | 95  | ✓ | ✓ |   | ✓ |  |
|         | 21           | ✓ |   |   | ✓ |   | ✓            | 46 |   |   | ✓ | ✓ |              | ✓  | 71 |   | ✓ |   | ✓            | ✓ | ✓  | 96  | ✓ | ✓ |   | ✓ |  |
|         | 22           | ✓ |   |   | ✓ |   | ✓            | 47 |   |   | ✓ | ✓ | ✓            | ✓  | 72 |   | ✓ | ✓ |              | ✓ | ✓  | 97  | ✓ | ✓ |   | ✓ |  |
|         | 23           | ✓ |   |   |   | ✓ | ✓            | 48 |   |   | ✓ |   | ✓            | ✓  | 73 |   | ✓ |   | ✓            | ✓ |    | 98  | ✓ | ✓ |   | ✓ |  |
|         | 24           | ✓ |   |   |   | ✓ | ✓            | 49 | ✓ |   | ✓ |   | ✓            | ✓  | 74 |   | ✓ |   | ✓            | ✓ | ✓  | 99  | ✓ | ✓ | ✓ |   |  |
|         | 25           | ✓ |   |   | ✓ |   | ✓            | 50 | ✓ |   | ✓ |   | ✓            | ✓  | 75 |   | ✓ |   |              | ✓ | ✓  | 100 | ✓ | ✓ | ✓ |   |  |

## Classification results per expert

| Cluster | Expert Number |    |    |    |    |    |    |    |    |    |    |    |    |    |    |    |    |    |
|---------|---------------|----|----|----|----|----|----|----|----|----|----|----|----|----|----|----|----|----|
|         | 1             | 2  | 3  | 4  | 5  | 6  | 7  | 8  | 9  | 10 | 11 | 12 | 13 | 14 | 15 | 16 | 17 | 18 |
| 1       |               |    | LE | LE |    |    |    | SK |    |    | LE | LE | LE | LE | LE |    | HA |    |
| 2       |               |    | LE | LE |    |    |    | LE |    |    | LE | LE | LE | LE | E  |    | LE |    |
| 3       |               |    | LE | HA |    |    |    | HA |    |    | LE | LE | LE | LE | LE |    | LE |    |
| 4       |               |    | U  | U  |    |    |    | HA |    |    | LE | HA | LE | HA | LE |    | HA |    |
| 5       |               |    | U  | LE |    |    |    | LE |    |    | LE | U  | U  | HR | SK |    | HA |    |
| 6       |               |    | HA | SK |    |    |    | HA |    |    | HA | HA | HA | HA | HA |    | SK |    |
| 7       |               |    | SK | HA |    |    |    | LE |    |    | LE | LE | LE | LE | SK |    | LE |    |
| 8       | HR            | LE |    |    |    | HA |    | HR |    | LE | LE |    |    |    |    | LE | LE | HR |
| 9       |               |    | LE | LE |    |    |    | LE |    |    | LE | LE | LE | LE | LE |    | LE |    |
| 10      | LE            | U  |    |    |    | SK |    | LE |    | LE | LE |    |    |    |    | LE | LE | SK |
| 11      | LE            |    | HR | HR |    | U  |    | HR |    |    | LE | U  |    |    |    |    | E  | HR |
| 12      |               | HA |    |    | HA |    | HA | SK | HA | HA | HA |    |    |    |    | HA | HA |    |
| 13      | SK            |    |    |    | HA | LE | HA | HR | HA |    | HA |    |    |    |    |    | HA | HA |
| 14      |               | LE |    |    | U  |    | HR | U  | U  | SK | LE |    |    |    |    | SK | LE |    |
| 15      |               |    | HA | LE | LE |    | HR | LE | SK |    | LE | LE |    |    |    |    | LE |    |
| 16      |               |    | LE | LE | LE |    | LE | LE | LE |    | LE | LE |    |    |    |    | LE |    |
| 17      |               |    | HR | HR | HR |    | HA | HR | HR |    | U  | HR |    |    |    |    | E  |    |
| 18      |               |    | LE | HR | LE |    | SK | LE | U  |    | LE | LE |    |    |    |    | LE |    |
| 19      |               | HA |    |    | HA |    | SK | LE | U  | SK | LE |    |    |    |    | HA | LE |    |
| 20      |               |    | LE | LE | LE |    | LE | LE | LE |    | LE | LE |    |    |    |    | LE |    |
| 21      |               |    | LE | U  | LE |    | U  | LE | LE |    | LE | LE |    |    |    |    | LE |    |
| 22      |               |    | SK | LE | LE |    | LE | LE | HA |    | LE | LE |    |    |    |    | LE |    |
| 23      |               | LE |    |    | LE |    | SK | LE | LE | LE | LE |    |    |    |    | LE | LE |    |
| 24      |               | SK |    |    | HA |    | HA | SK | SK | HA | U  |    |    |    |    | SK | SK |    |
| 25      |               |    | HA | LE | LE |    | LE | LE | LE |    | LE | LE |    |    |    |    | LE |    |
| 26      |               |    | U  | U  | U  |    | SK | LE | U  |    | LE | U  |    |    |    |    | U  |    |
| 27      |               |    | SK | SK | SK |    | SK | SK | SK |    | SK | SK |    |    |    |    | SK |    |
| 28      |               |    | HA | HA | HA |    | HA | HA | U  |    | HA | HA |    |    |    |    | HA |    |
| 29      |               |    | LE | LE | LE |    | LE | LE | LE |    | LE | LE |    |    |    |    | LE |    |
| 30      | U             |    |    |    | HR | HA | HR | HA | HA |    | HA |    |    |    |    |    | HA | HA |
| 31      |               |    | HA | HA | HA |    | SK | SK | HA |    | U  | HA |    |    |    |    | HA |    |
| 32      |               |    | SK | LE | LE |    | HA | LE | HA |    | U  | LE |    |    |    |    | LE |    |
| 33      | LE            |    | SK | HR |    | E  |    | HR |    |    | HA | U  |    |    |    |    | HR | SK |
| 34      |               |    | U  | HA | U  |    | HA | HA | HA |    | HA | HA |    |    |    |    | HA |    |
| 35      | HA            |    | HA | HA |    | HA |    | HA |    |    | HA | HA |    |    |    |    | HA | HA |
| 36      | SK            |    | HA | HA |    | HA |    | E  |    |    | HA | HA |    |    |    |    | U  | HA |
| 37      | LE            |    | LE | LE |    | SK |    | LE |    |    | LE | LE |    |    |    |    | LE | SK |
| 38      | E             |    | HR | U  |    | E  |    | HA |    |    | LE | LE |    |    |    |    | U  | HA |
| 39      | SK            |    | HA | HA |    | LE |    | SK |    |    | SK | U  |    |    |    |    | HA | HA |
| 40      | SK            |    | HA | HA |    | U  |    | U  |    |    | HA | U  |    |    |    |    | HA | HA |
| 41      | E             |    | E  | HR |    | HR |    | HR |    |    | HR | E  |    |    |    |    | E  | E  |

|    |    |    |    |    |    |    |    |    |    |    |    |    |    |    |    |    |    |    |    |
|----|----|----|----|----|----|----|----|----|----|----|----|----|----|----|----|----|----|----|----|
| 42 | HA |    | HA | U  |    | HA |    | HA |    |    | HA | U  |    |    |    |    | HA | HA |    |
| 43 | LE |    | SK | HA |    | SK |    | LE |    |    | HA | LE |    |    |    |    | LE | LE |    |
| 44 | LE |    | LE | LE |    | LE |    | LE |    |    | LE | LE |    |    |    |    | LE | LE |    |
| 45 | LE |    | LE | LE |    | LE |    | LE |    |    | LE | LE |    |    |    |    | LE | LE |    |
| 46 | LE |    | LE | LE |    | LE |    | LE |    |    | LE | LE |    |    |    |    | LE | LE |    |
| 47 | LE | HA | U  | HR |    | HA |    |    |    | U  |    | U  |    |    |    |    | HA |    | HA |
| 48 | LE | HR |    |    |    | HA |    | LE |    | HR | LE |    |    |    |    |    | LE | U  | HR |
| 49 | SK | U  |    |    | HR | HA | SK |    | U  | HA |    |    |    |    |    |    | U  |    | SK |
| 50 | HR | HR |    |    | E  | HR | HR |    | HR | HR |    |    |    |    |    |    | HR |    | HR |
| 51 | LE | LE |    |    | LE | LE | LE |    | LE | LE |    |    |    |    |    |    | LE |    | LE |
| 52 | SK | LE |    |    | U  | LE | LE |    | U  | LE |    |    |    |    |    |    | SK |    | SK |
| 53 | LE | LE |    |    | LE | LE | LE |    | LE | LE |    |    |    |    |    |    | LE |    | LE |
| 54 | LE | SK |    |    | U  | LE | U  |    | U  | HA |    |    |    |    |    |    | U  |    | HA |
| 55 | LE | LE |    |    | LE | SK | LE |    | HA | LE |    |    |    |    |    |    | LE |    | LE |
| 56 |    | HA | HA | HA |    |    |    |    |    | HA |    | HA | HA | HA | SK | HA |    |    |    |
| 57 |    | SK | SK | HA |    |    |    |    |    | SK |    | U  | U  | SK | SK | HR |    |    |    |
| 58 | U  |    | LE | HR |    | HA |    |    |    |    |    | U  | LE | HA | SK |    |    |    | HR |
| 59 | LE |    | LE | LE |    | LE |    |    |    |    |    | LE | LE | LE | LE |    |    |    | LE |
| 60 | LE |    |    |    | LE | LE | LE |    | LE |    |    |    | LE | LE | LE |    |    |    | LE |
| 61 | LE |    |    |    | LE | LE | LE |    | LE |    |    |    | LE | LE | LE |    |    |    | SK |
| 62 | HR |    |    |    | HR | HR | HR |    | HR |    |    |    | U  | E  | E  |    |    |    | E  |
| 63 | LE | LE |    |    | U  | U  | U  |    | LE | LE |    |    |    |    |    |    | LE |    | LE |
| 64 | U  | LE |    |    | U  | HA | LE |    | U  | LE |    |    |    |    |    |    | HA |    | LE |
| 65 | LE |    |    |    | LE | U  | SK |    | U  |    |    |    | LE | U  | LE |    |    |    | LE |
| 66 | U  | HA |    |    | HR | HA | U  |    | U  | HA |    |    |    |    |    |    | HR |    | HA |
| 67 | LE | LE |    |    |    | LE |    |    |    | LE |    |    | LE | LE | LE | LE | LE |    | LE |
| 68 | LE | SK |    |    |    | SK |    |    |    | LE |    |    | SK | LE | SK | LE |    |    | LE |
| 69 |    | HA | HA | SK |    |    |    |    |    | SK |    | SK | SK | SK | SK | SK | SK |    |    |
| 70 | E  | E  |    |    |    | LE |    |    |    | LE |    |    | U  | HA | E  | E  |    |    | E  |
| 71 |    | LE | U  | U  |    |    |    |    |    | LE |    | U  | U  | HA | LE | HA |    |    |    |
| 72 | SK | U  |    |    |    | HR |    |    |    | HR |    |    | HR | HR | U  | E  |    |    | HR |
| 73 |    | LE | LE | LE |    |    |    |    |    | LE |    | LE | LE | LE | SK | LE |    |    |    |
| 74 |    | E  | E  | E  |    |    |    |    |    | HR |    | E  | E  | E  | E  | E  |    |    |    |
| 75 |    | SK |    |    |    |    |    | LE |    | LE | U  |    | U  | SK | LE | U  | HA |    |    |
| 76 |    | HA |    |    |    |    |    | HA |    | HA | HA |    | HA | HA | SK | HA | HA |    |    |
| 77 |    | LE |    |    |    |    |    | HA |    | LE | U  |    | LE | LE | LE | LE | LE |    |    |
| 78 | LE |    |    |    | U  | HA | LE |    | HA |    |    |    | HA | U  | HA |    |    |    | HA |
| 79 | LE | LE |    |    |    | HR |    |    |    | LE |    |    | LE | LE | LE | LE |    |    | LE |
| 80 | LE | SK |    |    |    | SK |    |    |    | SK |    |    | U  | HA | SK | LE |    |    | SK |
| 81 | LE | LE |    |    |    | LE |    |    |    | LE |    |    | LE | LE | LE | LE |    |    | LE |
| 82 |    | LE |    |    | LE |    | LE |    | LE | LE |    |    | LE | LE | LE | LE |    |    |    |
| 83 | LE | LE |    |    |    | U  |    |    |    | LE |    |    | U  | LE | U  | HA |    |    | LE |
| 84 | SK | HA |    |    |    | SK |    |    |    | SK |    |    | SK | SK | SK | SK |    |    | SK |
| 85 |    | LE |    |    | LE |    | HA |    | LE | LE |    |    | LE | LE | LE | LE |    |    |    |
| 86 |    | U  |    |    | HA |    | HA |    | HA | LE |    |    | U  | HA | LE | HA |    |    |    |



|     |    |    |    |    |    |    |    |  |    |    |  |    |    |    |    |    |  |    |
|-----|----|----|----|----|----|----|----|--|----|----|--|----|----|----|----|----|--|----|
| 87  | E  | HR |    |    |    | E  |    |  |    | HR |  |    | E  | E  | E  | E  |  | E  |
| 88  |    | HR |    |    | HR |    | HR |  | LE | HR |  |    | U  | HR | HR | LE |  |    |
| 89  |    | E  |    |    | E  |    | E  |  | E  | E  |  |    | E  | HR | E  | E  |  |    |
| 90  | LE |    | U  | LE |    | SK |    |  |    |    |  | U  | U  | HA | HA |    |  | HA |
| 91  |    | LE |    |    | LE |    | U  |  | U  | LE |  |    | LE | LE | U  | LE |  |    |
| 92  | LE |    | LE | LE |    | E  |    |  |    |    |  | LE | U  | HA | LE |    |  | LE |
| 93  |    | U  |    |    | U  |    | U  |  | HR | U  |  |    | U  | HA | LE | HR |  |    |
| 94  |    | HA |    |    | HA |    | LE |  | HA | HA |  |    | U  | HA | U  | HA |  |    |
| 95  |    | LE |    |    | HR |    | HR |  | HR | HA |  |    | HR | LE | LE | LE |  |    |
| 96  |    | HR |    |    | HR |    | HR |  | HR | HR |  |    | HR | HR | HR | HR |  |    |
| 97  |    | HR |    |    | HR |    | HA |  | U  | HA |  |    | HR | U  | SK | HR |  |    |
| 98  |    | SK |    |    | U  |    | LE |  | U  | SK |  |    | U  | LE | LE | LE |  |    |
| 99  |    |    | LE | HR | HR |    | LE |  | SK |    |  | U  | U  | LE | U  |    |  |    |
| 100 | HR |    | HR | HR |    | HA |    |  |    |    |  | LE | HR | LE | U  |    |  | LE |

HA = Human Activity  
 SK = Scientific Knowledge  
 LE= Learning Environment  
 E = Entertainment  
 HR = Human Relationship  
 U = Undefined

#### **ESI 4: Classification of the tweets sample from the learning environment topic**

### Classification of the tweets sample containing the term “test” from Learning Environment topic

Note: Twitter user names have been replaced by “[Name redacted]” in the tweets to keep users anonymity

| Number | Tweet                                                                                                                                                                                                                                                                                                                                    | IRONY | POSITIVE | NEGATIVE | NEUTRAL | UNKNOWN |
|--------|------------------------------------------------------------------------------------------------------------------------------------------------------------------------------------------------------------------------------------------------------------------------------------------------------------------------------------------|-------|----------|----------|---------|---------|
| 1      | Can someone please FaceTime me for like 10 mins and teach me how to do the Chem test                                                                                                                                                                                                                                                     |       |          |          | X       |         |
| 2      | He's gonna see my first test score and laugh ÃÃÃÃÃÃÃÃ I NEED TO GET AN A ON MY CHEM TEST I AM SO DETERMINED TO IMPRESS HIM                                                                                                                                                                                                       |       | X        |          |         |         |
| 3      | Positive that I'm failing this chemistry test tomorrow<ed><U+00A0><U+00BD><ed><U+00B8><U+008A><ed><U+00A0><U+00BD><ed><U+00B8><U+008A><ed><U+00A0><U+00BD><ed><U+00B8><U+008A>                                                                                                                                                           | X     |          | X        |         |         |
| 4      | Chemistry test tomorrow and I have no clue what we've even been "learning"                                                                                                                                                                                                                                                               | X     |          | X        |         |         |
| 5      | I NEED to good on this chem test                                                                                                                                                                                                                                                                                                         |       |          |          | X       |         |
| 6      | Failing this chem test tomorrow                                                                                                                                                                                                                                                                                                          |       |          | X        |         |         |
| 7      | I'm honestly really pissed off I got a 90 on my Chemistry test and not a 100 bye                                                                                                                                                                                                                                                         |       |          | X        |         |         |
| 8      | lol guessed on more than half the questions on my chem test                                                                                                                                                                                                                                                                              |       |          |          | X       |         |
| 9      | 97 on chem test is this even real life                                                                                                                                                                                                                                                                                                   | X     |          |          |         | X       |
| 10     | [Name redacted] i did great on my speech but failed my chem test lmao                                                                                                                                                                                                                                                                    |       |          | X        |         |         |
| 11     | That chemistry test was some kinda ridiculous #prayformygrades                                                                                                                                                                                                                                                                           | X     |          | X        |         |         |
| 12     | I put avocado's constant on my chem test and my teacher didn't even notice                                                                                                                                                                                                                                                               | X     |          |          | X       |         |
| 13     | My chem test was actually my professor playing a trick on me.                                                                                                                                                                                                                                                                            | X     |          |          | X       |         |
| 14     | I hope I'll have time to finish my Chem. test tomorrow, orthodontics are an inconvenience.                                                                                                                                                                                                                                               |       |          | X        |         |         |
| 15     | Just so everyone knows, after my last Chem test I decided I'm going to TSTC to get certified as a welder. Ray Bans better be OSHA approved.                                                                                                                                                                                              |       |          |          | X       |         |
| 16     | Tfw you drive out to Barnes and Noble and deal with idiots on 19 only to find out that they're sold out of the ap chem test book #weeping                                                                                                                                                                                                |       |          |          | X       |         |
| 17     | Hehe chemistry test tmoro hehe can't wait to fail hehe forgot everything I revised Xxxxxxxxxzxx                                                                                                                                                                                                                                          | X     |          | X        |         |         |
| 18     | All I want is a tall guy with a sense of humor and to pass this chem test is that too much to ask foe                                                                                                                                                                                                                                    |       |          |          | X       |         |
| 19     | Chem and eng test today                                                                                                                                                                                                                                                                                                                  |       |          |          | X       |         |
| 20     | WOO CHEMISTRY TEST TOMORROW YEP SO FUN I LOVE SCHOOL SO STRESS FREE AND EVERYTHING WOW                                                                                                                                                                                                                                                   |       | X        |          |         |         |
| 21     | I still haven't studied for this Chemistry Test <ed><U+00A0><U+00BD><ed><U+00B8><U+0085><ed><U+00A0><U+00BD><ed><U+00B8><U+0085><ed><U+00A0><U+00BD><ed><U+00B8><U+0085><ed><U+00A0><U+00BD><ed><U+00B8><U+0085><ed><U+00A0><U+00BD><ed><U+00B8><U+0085><ed><U+00A0><U+00BD><ed><U+00B8><U+0085><ed><U+00A0><U+00BD><ed><U+00B8><U+0085> |       |          |          | X       |         |
| 22     | When you have 6 hours of dance, calculus homework, and a chem test to study for :,) <a href="http://t.co/K2qHVRzyxU">http://t.co/K2qHVRzyxU</a>                                                                                                                                                                                          | X     |          |          |         | X       |
| 23     | [Name redacted] Me when I read the first question on my chemistry test.. <a href="http://t.co/v6KndKdjPqâ€thx">http://t.co/v6KndKdjPqâ€thx</a> [Name redacted]                                                                                                                                                                         | X     |          |          |         | X       |
| 24     | I've been procrastinating to study for my Chem test since Friday                                                                                                                                                                                                                                                                         |       |          |          | X       |         |
| 25     | [Name redacted] so i shouldn't study for the chem test and govt vocab quiz?                                                                                                                                                                                                                                                              |       |          |          | X       |         |
| 26     | Now study for this chemistry and pre-cal test tomorrow!                                                                                                                                                                                                                                                                                  |       |          |          | X       |         |
| 27     | Bears' promising draft picks must pass chemistry test <a href="http://t.co/8mfg1IR40j">http://t.co/8mfg1IR40j</a> [Sale <a href="http://t.co/NEiwkXgvpB">http://t.co/NEiwkXgvpB</a> ] #news                                                                                                                                              | X     |          | X        |         |         |

|    |                                                                                                                                                                                                                                                   |   |   |   |   |   |
|----|---------------------------------------------------------------------------------------------------------------------------------------------------------------------------------------------------------------------------------------------------|---|---|---|---|---|
| 28 | Why the fuck do we have a Chem test a week before the final?? <ed><U+00A0><U+00BD><ed><U+00B8><U+0092> #HateChemistry #Dumb                                                                                                                       |   |   |   | X |   |
| 29 | Anyone have a notecard for the chemistry test I could borrow a picture from?                                                                                                                                                                      |   |   |   | X |   |
| 30 | Called off work, A on chem test.. Its a good day                                                                                                                                                                                                  |   | X |   |   |   |
| 31 | kind of feeling alright about this chemistry test tomorrow...very unusual feeling Ã ÃÃÃ                                                                                                                                                       |   | X |   |   |   |
| 32 | I dont know about an all nighter.. But I do know I'll be in the study room until about 3am Ã ÃÃÃâ¬ Chem test tomorrow                                                                                                                        |   |   |   | X |   |
| 33 | A on this Chem test and Spring Break starts tomorrow<ed><U+00A0><U+00BD><ed><U+00B8><U+008E>                                                                                                                                                      |   | X |   |   |   |
| 34 | I'm pretty sure im going to fail the chem test tomorrow I don't understand what we learned recently                                                                                                                                               |   |   | X |   |   |
| 35 | this vine went off on full volume during the chem test i literally hate myself <a href="https://t.co/hk9zKvr4zX">https://t.co/hk9zKvr4zX</a>                                                                                                      |   |   | X |   |   |
| 36 | Chem test, pre-cal test, and a presentation all tomorrow<br><ed><U+00A0><U+00BD><ed><U+00B8><U+0085><ed><U+00A0><U+00BD><ed><U+00B4><U+00AB>                                                                                                      |   |   |   | X |   |
| 37 | [Name redacted] probably from the chem test I took before<br>pe<ed><U+00A0><U+00BD><ed><U+00B8><U+0085><ed><U+00A0><U+00BD><ed><U+00B8><U+0082> I should really take it easy<br>this last couple of weeks<ed><U+00A0><U+00BD><ed><U+00B8><U+00B4> |   |   |   | X |   |
| 38 | Planning on crying the entire time during the chemistry test tomorrow and wherever my tears land, that will be my<br>answer<ed><U+00A0><U+00BD><ed><U+00B1><U+008D>                                                                               |   |   | X |   |   |
| 39 | I might actually fail tomorrow's Chem test                                                                                                                                                                                                        |   |   | X |   |   |
| 40 | How are we suppose to take a chem test on Tuesday when everyone was taken out for testing?!???                                                                                                                                                    |   |   |   | X |   |
| 41 | No precalc or chem test tomorrow thank you JesusÃ ÃÃÃÃÃÃÃ                                                                                                                                                                                 | X |   | X |   |   |
| 42 | So I barely failed my chemistry test and my grade up 3 points                                                                                                                                                                                     |   |   |   | X |   |
| 43 | I feel smart when I know how to do everything on a chemistry test Ã ÃÃÃÃÃÃÃ                                                                                                                                                               |   | X |   |   |   |
| 44 | [Name redacted] cmon I'm supposed to be studying for a chem test hurry up pls                                                                                                                                                                     |   |   |   | X |   |
| 45 | trust my chem teacher to give me a test on lunar new years                                                                                                                                                                                        |   | X |   |   |   |
| 46 | My girl really on the phone with her Chem professor going over a practice test the night before her exam, lmao she so cute and<br>dedicated <ed><U+00A0><U+00BD><ed><U+00B8><U+008D>                                                              | X | X |   |   |   |
| 47 | No Not really that means I still have to take a fuckING chem test abd probably do bad on it                                                                                                                                                       |   |   | X |   |   |
| 48 | Should probably just go ahead and embrace that I'm gonna make like a 30 on my chem 2 test tomorrow.Ã ÃÃÃÃÃÃÃ                                                                                                                              | X |   | X |   |   |
| 49 | I have two papers due tomorrow and a chemistry test :)                                                                                                                                                                                            |   |   |   | X |   |
| 50 | Chem teacher bringing us candy for this test lol                                                                                                                                                                                                  |   | X |   |   |   |
| 51 | So i need to ace this Chem test to boost my grade 13%                                                                                                                                                                                             |   |   |   | X |   |
| 52 | [Name redacted] I hope that's the case. No chem test tomorrow                                                                                                                                                                                     |   |   |   | X |   |
| 53 | Got the highest score on my Chemistry test <U+263A><U+FE0F> #Happy                                                                                                                                                                                |   | X |   |   |   |
| 54 | [Name redacted] you can't get a 98 on a chem test without bawling Ã ÃÃÃÃ                                                                                                                                                                     | X |   | X |   |   |
| 55 | That chem test.... As long as I have an 80 I'll be straight                                                                                                                                                                                       |   |   | X |   |   |
| 56 | I'm literally going to fail my chem test tomorrow <ed><U+00A0><U+00BD><ed><U+00B8><U+009E> I don't understand what's going<br>on.....                                                                                                             |   |   | X |   |   |
| 57 | [Name redacted] When your dog isn't Lassie <a href="https://t.co/JNXDnEs1uAAcâÃ">https://t.co/JNXDnEs1uAAcâÃ</a> [Name redacted] during that o-chem test...                                                                                 |   |   |   |   | X |
| 58 | chem test i can do like most part of the subject i feel?but half equation is so much bullshit like wtf is that                                                                                                                                    |   |   | X |   |   |
| 59 | One time [Name redacted] wrote me this during a chemistry test <a href="http://t.co/quB4jLvzGq">http://t.co/quB4jLvzGq</a>                                                                                                                        |   |   |   | X |   |
| 60 | [Name redacted] but a one on the ap chem test<ed><U+00A0><U+00BD><ed><U+00B8><U+008E>                                                                                                                                                             |   |   |   | X |   |
| 61 | I hate the people that come to Organic Chem extra lectures ONLY the week of the test Ã ÃÃÃÃÃÃÃ                                                                                                                                            |   |   | X |   |   |

|    |                                                                                                                                                                                                                    |   |   |   |   |   |
|----|--------------------------------------------------------------------------------------------------------------------------------------------------------------------------------------------------------------------|---|---|---|---|---|
| 62 | I'm ready for this chemistry test <ed><U+00A0><U+00BD><ed><U+00B8><U+0088>                                                                                                                                         |   | X |   |   |   |
| 63 | I've called Robyn twice and asked her if I'm ready for the Chem test tomorrow. #FreeEnergy #CommonIonEffect #LeChÃteliersPrinciple #Crying                                                                         |   |   |   | X |   |
| 64 | Even though my chem test is open note I'm still gunna fail :)                                                                                                                                                      |   |   | X |   |   |
| 65 | What is the chem test even on???                                                                                                                                                                                   |   |   |   |   | X |
| 66 | Mad we have a Chem test tomorrow <ed><U+00A0><U+00BD><ed><U+00B8><U+0091>                                                                                                                                          |   |   | X |   |   |
| 67 | i should be studying for my chemistry test tomorrow but oh well                                                                                                                                                    |   |   |   | X |   |
| 68 | No idea how I pulled off an 85 on that chem. test ÃÂ Â½ÃÂ,Ã³                                                                                                                                                       | X | X |   |   |   |
| 69 | I GOT A 95 ON MY CHEM TEST. OMG. ÃÂ Â½ÃÂ,ÃÃÂ Â½ÃÂ,ÃÃÂ Â½ÃÂ,ÃÃÂ Â½ÃÂ,Ã                                                                                                                                          |   | X |   |   |   |
| 70 | about me: tries on shoes instead of studying for my chem 2 test on friday. whoops                                                                                                                                  |   |   | X |   |   |
| 71 | I can't believe I passed my chemistry test<ed><U+00A0><U+00BD><ed><U+00B8><U+0085>                                                                                                                                 |   | X |   |   |   |
| 72 | Yay for Socials test, Physics test, and Chem quiz on the last day before spring break.                                                                                                                             |   |   |   | X |   |
| 73 | I HAVE A CHEM TEST TOMORROW IM GOING TO FAIL WOO                                                                                                                                                                   |   |   | X |   |   |
| 74 | this kid in my class carved the table of elements into his arm so he could cheat on a chem test                                                                                                                    |   |   |   | X |   |
| 75 | Alright so .. I had a SI Session for my Chem test just now ... There were only like 5 people in there <ed><U+00A0><U+00BD><ed><U+00B2><U+0080><ed><U+00A0><U+00BD><ed><U+00B2><U+0080>                             |   |   |   | X |   |
| 76 | for the last 3 nights I've had the same dream about me taking this upcoming chem test and it's so scary lol #ChemIsTheReasonIHaveNightmares                                                                        |   |   | X |   |   |
| 77 | i actually feel like studying for this chem test                                                                                                                                                                   |   |   |   |   | X |
| 78 | [Name redacted] when you fail a chem test but it's okay because it's a four day weekend <ed><U+00A0><U+00BD><ed><U+00B8><U+0080>â€ [Name redacted]                                                                | X |   |   |   | X |
| 79 | Studying for the AP chem test may be the death of me                                                                                                                                                               |   |   | X |   |   |
| 80 | [Name redacted] I need some help on this Chem Test. You got me?                                                                                                                                                    |   |   |   | X |   |
| 81 | I REPEAT NO CHEM TEST TOMORROW                                                                                                                                                                                     |   |   |   | X |   |
| 82 | Why did i even sign up for the AP chem test lmao                                                                                                                                                                   |   |   |   |   | X |
| 83 | Reminder to all AP students that your UT homework is due by midnight tonight and your MC test is tomorrow. Study hard! :)                                                                                          |   |   |   | X |   |
| 84 | Serious Inquiry: Can someone teach me Chem & calc before my test Monday??                                                                                                                                          |   |   |   | X |   |
| 85 | if your in chem honors and have to do the take home test help me out we can take this together                                                                                                                     |   |   |   | X |   |
| 86 | Didn't do econs or maths or studied for chem test. AHAHAHAH. fml                                                                                                                                                   |   |   |   | X |   |
| 87 | Want to do something fun tonight but chemistry test Monday <ed><U+00A0><U+00BD><ed><U+00B8><U+00AD>                                                                                                                |   |   |   | X |   |
| 88 | [Name redacted] parasitology* Because urine analysis special for urine test ( physical,chemical, and under microscope)                                                                                             |   |   |   | X |   |
| 89 | Okay, chemistry test, what's the name of HCl, HBr, HCN and H2S ?                                                                                                                                                   |   |   |   | X |   |
| 90 | When ur AP Chem test gets postponed a week <a href="http://t.co/rpjLaBxnTC">http://t.co/rpjLaBxnTC</a>                                                                                                             | X |   |   |   | X |
| 91 | I'm 110% sure that I failed my chemistry test :~))                                                                                                                                                                 |   |   | X |   |   |
| 92 | Today I wrote history paper, did two calculus assignments, and studied for my chem test... What is wrong with me                                                                                                   |   | X |   |   |   |
| 93 | [Name redacted] I have inorganic Chem book on my laptop that you can get off with a jump drive, and I THINK I have the old test book [Name redacted] home                                                          | X |   | X |   |   |
| 94 | I wanna give a big shout out to Google for helping me finally pass my ionic test in chem. <ed><U+00A0><U+00BD><ed><U+00B2><U+00AF><ed><U+00A0><U+00BD><ed><U+00B1><U+008C><ed><U+00A0><U+00BD><ed><U+00B8><U+0082> |   | X |   |   |   |

|     |                                                                                                                                                                                                                                                                               |   |   |   |   |   |
|-----|-------------------------------------------------------------------------------------------------------------------------------------------------------------------------------------------------------------------------------------------------------------------------------|---|---|---|---|---|
| 95  | I got an 85 on my chem test IM SO HAPPY I COULD CRY <ed><U+00A0><U+00BD><ed><U+00B8><U+00AD> I'm celebrating tonight                                                                                                                                                          |   | X |   |   |   |
| 96  | [Name redacted] Got a three on my AP Chem exam. LSA AP guidelines say I need to test into an advanced course for credit on the AP I took, right?                                                                                                                              |   |   |   | X |   |
| 97  | This chem test bout to kill me ÃÂ Â½ÃÂ, Â©                                                                                                                                                                                                                                    |   |   | X |   |   |
| 98  | I have a chemistry quiz, religion quiz, english test, and math test tmrw but I have no reason to be stressed !!!! :)                                                                                                                                                          | X |   | X |   |   |
| 99  | [Name redacted] cuz that Chem test straight put me into next week<br><ed><U+00A0><U+00BD><ed><U+00B8><U+00AD><ed><U+00A0><U+00BD><ed><U+00B8><U+00AD>                                                                                                                         |   |   |   | X |   |
| 100 | Spanish movie <U+2714><U+FE0F><br>Rhetoric project <U+2714><U+FE0F><br>Calculus quiz <U+2714><U+FE0F><br>Chemistry II test <U+2714><U+FE0F><br>Intro to Lit test <U+2714><U+FE0F><br>Bring on the weekend <ed><U+00A0><U+00BD><ed><U+00B8><U+0085>                            |   |   |   |   | X |
| 101 | [Name redacted] wanna study for the chemistry test with me and rohan tonight?                                                                                                                                                                                                 |   |   |   | X |   |
| 102 | Just gotta get through a chem test tomorrow morning then it's gonna be such a fun weekend<br><ed><U+00A0><U+00BD><ed><U+00B8><U+008E><ed><U+00A0><U+00BC><ed><U+00BC><U+0086><U+26BE><U+FE0F><ed><U+00A0><U+00BC><ed><U+00BC><U+0083><ed><U+00A0><U+00BD><ed><U+00B1><U+0097> |   |   |   | X |   |
| 103 | When you get an A in the Chemistry test and Math test<ed><U+00A0><U+00BD><ed><U+00B8><U+008A><ed><U+00A0><U+00BD><ed><U+00B8><U+008A>                                                                                                                                         | X |   |   |   | X |
| 104 | I love having a chem test and a lab report due on the same day<U+2764><U+FE0F>                                                                                                                                                                                                | X |   |   |   | X |
| 105 | I really don't want to take that chemistry test tomorrow ÃÂ Â½ÃÂ, â€¦ÃÂ Â½ÃÂ Ã«                                                                                                                                                                                               |   |   |   | X |   |
| 106 | yup definitely bombed that chem test                                                                                                                                                                                                                                          | X |   |   |   | X |
| 107 | Gonna run and then die bc i have my chem test tomorrow                                                                                                                                                                                                                        |   |   | X |   |   |
| 108 | This chemistry test shall be the death of me<br><ed><U+00A0><U+00BD><ed><U+00B8><U+0096><ed><U+00A0><U+00BD><ed><U+00B8><U+00AD>                                                                                                                                              |   |   | X |   |   |
| 109 | Dear Lord, please let me pass this Chem test<ed><U+00A0><U+00BD><ed><U+00B9><U+008F><ed><U+00A0><U+00BD><ed><U+00B9><U+008F><ed><U+00A0><U+00BD><ed><U+00B9><U+008F>                                                                                                          |   |   | X |   |   |
| 110 | Good thing my years of competitive swimming have prepared me for this moment. I am ready to swim to my Chem test this evening                                                                                                                                                 |   | X |   |   |   |
| 111 | got a B on my chemistry test <ed><U+00A0><U+00BD><ed><U+00B8><U+0086> what's happening                                                                                                                                                                                        |   |   |   | X |   |
| 112 | Omg I have a huge chem test tomorrow                                                                                                                                                                                                                                          |   |   |   | X |   |
| 113 | speaking of the chem test tho lol i failed                                                                                                                                                                                                                                    |   |   |   | X |   |
| 114 | Completely forgot about this Chem test I gotta take after school tomorrowÃÂ Â½ÃÂ, Â                                                                                                                                                                                           |   |   |   | X |   |
| 115 | Hey maybe McNeill will curve that Hon. Chem test for me tomorrow since it's my birthday                                                                                                                                                                                       |   |   |   | X |   |
| 116 | First organic chemistry test tonight.... Will someone start digging my grave now?                                                                                                                                                                                             | X |   | X |   |   |
| 117 | Whoever took pics of the AP Chem test today your annoying cause now I have to take a whole new one. So screw you guys<br><ed><U+00A0><U+00BD><ed><U+00B8><U+0092>                                                                                                             |   |   |   | X |   |
| 118 | not prepared for chem test. not at all                                                                                                                                                                                                                                        |   |   | X |   |   |
| 119 | Tbh the ap chem test wouldnt be that bad if i studied for it                                                                                                                                                                                                                  |   |   | X |   |   |
| 120 | [Name redacted] me walking in to the Chem test tomorrow <a href="http://t.co/ojd7CcDxGx">http://t.co/ojd7CcDxGx</a>                                                                                                                                                           | X |   |   |   | X |
| 121 | SOMEONE HELP ME WITH CHEMISTRY IM NOT JOKING IM GOING TO FAIL MY TEST TOMORROW AND CRY                                                                                                                                                                                        |   |   | X |   |   |
| 122 | Wow the AP Chem test is coming up and I'd rather fall off a cliff than take it.                                                                                                                                                                                               | X |   | X |   |   |

|     |                                                                                                                                                                                                                    |   |   |   |   |   |
|-----|--------------------------------------------------------------------------------------------------------------------------------------------------------------------------------------------------------------------|---|---|---|---|---|
| 123 | Have a chemistry test tomorow and i'm here watching YouTube videos <ed><U+00A0><U+00BD><ed><U+00B8><U+0094>                                                                                                        | X |   |   |   | X |
| 124 | But i haven't revised for my chemistry test and so my teacher is going to hate me even more<br><ed><U+00A0><U+00BD><ed><U+00B8><U+00A9><ed><U+00A0><U+00BD><ed><U+00B8><U+00A9>                                    |   |   | X |   |   |
| 125 | when you've only passed like 2-3 chemistry test all year<br><ed><U+00A0><U+00BD><ed><U+00B8><U+008A><ed><U+00A0><U+00BD><ed><U+00B8><U+008A><ed><U+00A0><U+00BD><ed><U+00B8><U+008A> cause my teacher sucks ass    | X |   |   |   | X |
| 126 | I am crossing every finger and toe on my body that I got at least a C on that chemistry test<br><ed><U+00A0><U+00BD><ed><U+00B9><U+008F>                                                                           |   |   | X |   |   |
| 127 | when you gotta study for dat chem test next period during band <a href="http://t.co/c0HpdVDgUu">http://t.co/c0HpdVDgUu</a>                                                                                         | X |   |   |   | X |
| 128 | i have a french and chemistry test tomorrow and am not prepared for either                                                                                                                                         |   |   |   | X |   |
| 129 | time to start my weekly cry bc chem test tomorrow                                                                                                                                                                  |   |   | X |   |   |
| 130 | I would study for my chem test tmrw but then that means I would have to know what it's over                                                                                                                        |   |   |   | X |   |
| 131 | Peer leading came in clutch getting me out of taking this Chem test tomorrow                                                                                                                                       | X |   | X |   |   |
| 132 | aw how cute crys is all nervous for her chem test                                                                                                                                                                  |   |   |   | X |   |
| 133 | I told tarah to wish me luck for my Chem test and she literally gave me a horse shoe. My bae &gt; your bae <a href="http://t.co/CfIJGJP1hX">http://t.co/CfIJGJP1hX</a>                                             | X |   | X |   |   |
| 134 | Really sad I have a chem test tomorrow and a chem final on Saturday<br><ed><U+00A0><U+00BD><ed><U+00B8><U+00AD><ed><U+00A0><U+00BD><ed><U+00B8><U+00AD> but at least I'm DONE after this week!!!!                  |   |   | X |   |   |
| 135 | The grades for our last chem test are posted... <ed><U+00A0><U+00BD><ed><U+00B8><U+00B3> lol [Name redacted] [Name redacted]                                                                                       |   |   |   | X |   |
| 136 | There is no doubt I am failin this chem test tomorrow!                                                                                                                                                             |   |   | X |   |   |
| 137 | ÃÃ Ã½Ã²â€ÃÃ Ã½Ã²Ã¶- best saxophone player out there. Also do we have a chemistry test tomorrow? Lmao                                                                                                               |   |   |   | X |   |
| 138 | someone help me with these chem test corrections.                                                                                                                                                                  |   |   | X |   |   |
| 139 | i really need to do good on my chem test and then i have tech week and ugh                                                                                                                                         |   |   |   | X |   |
| 140 | Praying to god I did well on that chem test ÃÃ Ã½Ã²,â€!                                                                                                                                                            |   |   | X |   |   |
| 141 | I GOT A FUCKING D+ on my chemistry TEST THAT I THOUGHT I FAILED!! ONE POINT AWAY FROM A C.. What is life!?!?<ed><U+00A0><U+00BD><ed><U+00B8><U+00AD>                                                               |   |   | X |   |   |
| 142 | Today I went to talk to my chem teacher about the C- I got on a test... Now I have a B+ ÃÃ Ã½Ã²Ã¹,~                                                                                                                |   | X |   |   |   |
| 143 | 100 question Chemistry test this week and I don't understand anything... In need of a tutor pronto<ed><U+00A0><U+00BD><ed><U+00B8><U+00AD>                                                                         |   |   | X |   |   |
| 144 | I GOT A 100 ON MY CHEM TEST I'M IN TEARS                                                                                                                                                                           | X | X |   |   |   |
| 145 | Last ap chem test tomorrow and I couldn't be more excited to be done                                                                                                                                               |   |   |   | X |   |
| 146 | Just registered for the AP chem test <ed><U+00A0><U+00BD><ed><U+00B8><U+00A2>                                                                                                                                      |   |   |   | X |   |
| 147 | Need help with my Chemistry test                                                                                                                                                                                   |   |   | X |   |   |
| 148 | [Name redacted] please come take my chemistry test for me tomorrow<br><ed><U+00A0><U+00BD><ed><U+00B8><U+008A><ed><U+00A0><U+00BD><ed><U+00B8><U+008A> <a href="http://t.co/Wn4GsXeojh">http://t.co/Wn4GsXeojh</a> |   |   | X |   |   |
| 149 | The chemistry test literally killed my brain.                                                                                                                                                                      | X |   | X |   |   |
| 150 | I'm tired but I have homework and to study for my chem test tomorrow wow                                                                                                                                           |   |   |   | X |   |
| 151 | I'm hoping I have a dream that teaches me everything I need to know for my chemistry test tomorrow                                                                                                                 | X |   | X |   |   |
| 152 | Chemistry test tomorrow and I still have no idea was anything is.. Oh well. ÃÃ Ã½Ã²Ã¹,Ã                                                                                                                            |   |   | X |   |   |
| 153 | 103 on my chem test, A on calc 2, and a 99 on my engineering test. love getting good news                                                                                                                          |   | X |   |   |   |

|     |                                                                                                                                                                                                                                                                                                                                                                                                                                                                                                                                                                                                                                                                                                                                                                                                |   |   |   |   |   |
|-----|------------------------------------------------------------------------------------------------------------------------------------------------------------------------------------------------------------------------------------------------------------------------------------------------------------------------------------------------------------------------------------------------------------------------------------------------------------------------------------------------------------------------------------------------------------------------------------------------------------------------------------------------------------------------------------------------------------------------------------------------------------------------------------------------|---|---|---|---|---|
| 154 | gotta learn several units of maths before 2pm after this chem test too :(                                                                                                                                                                                                                                                                                                                                                                                                                                                                                                                                                                                                                                                                                                                      |   |   | X |   |   |
| 155 | #CNNBeLike 17 black man gunned down by police. Had answer key for chemistry test the next day texted to him moments before incident.                                                                                                                                                                                                                                                                                                                                                                                                                                                                                                                                                                                                                                                           | X |   | X |   |   |
| 156 | I hope I don't have school tomorrow. ÃÄ Ä½ÃÄ'Ä. Not ready for this Chemistry test. ÃÄ Ä½ÃÄ,Ä©                                                                                                                                                                                                                                                                                                                                                                                                                                                                                                                                                                                                                                                                                                  |   |   | X |   |   |
| 157 | [Name redacted] or a chem test the monday after :)                                                                                                                                                                                                                                                                                                                                                                                                                                                                                                                                                                                                                                                                                                                                             |   |   |   | X |   |
| 158 | lol to that chem test                                                                                                                                                                                                                                                                                                                                                                                                                                                                                                                                                                                                                                                                                                                                                                          |   |   |   | X |   |
| 159 | My littler sister got a 100% on her chemistry test, proud of you little rachetÃÄ Ä½ÃÄ,Ëœ                                                                                                                                                                                                                                                                                                                                                                                                                                                                                                                                                                                                                                                                                                       |   | X |   |   |   |
| 160 | I'm really upset over the grade I got on my chem test<br><ed><U+00A0><U+00BD><ed><U+00B8><U+00AD><ed><U+00A0><U+00BD><ed><U+00B8><U+00AD>                                                                                                                                                                                                                                                                                                                                                                                                                                                                                                                                                                                                                                                      |   |   | X |   |   |
| 161 | Fact: Aubrie McIntosh will get a 1 on her AP Chem test tomorrow.                                                                                                                                                                                                                                                                                                                                                                                                                                                                                                                                                                                                                                                                                                                               |   |   |   | X |   |
| 162 | wait, am I dreaming? a chemistry, algebra, & whap test all in 2 days? someone pinch me, christmas came early this year!!!!<br><ed><U+00A0><U+00BD><ed><U+00B9><U+008F><ed><U+00A0><U+00BC><ed><U+00BF><U+00BC><ed><U+00A0><U+00BD><ed><U+00B9><U+008F><ed><U+00A0><U+00BC><ed><U+00BF><U+00BC><ed><U+00A0><U+00BD><ed><U+00B8><U+008D><ed><U+00A0><U+00BD><ed><U+00B2><U+0096><ed><U+00A0><U+00BD><ed><U+00B2><U+00AF><ed><U+00A0><U+00BD><ed><U+00B2><U+00AF><ed><U+00A0><U+00BD><ed><U+00B2><U+00A5><ed><U+00A0><U+00BD><ed><U+00B8><U+009C><ed><U+00A0><U+00BD><ed><U+00B2><U+009C><ed><U+00A0><U+00BD><ed><U+00B1><U+008C><ed><U+00A0><U+00BC><ed><U+00BF><U+00BC><ed><U+00A0><U+00BD><ed><U+00B1><U+008C><ed><U+00A0><U+00BC><ed><U+00BF><U+00BC><ed><U+00A0><U+00BD><ed><U+00B8><U+0084> | X |   |   |   | X |
| 163 | Last two days of spring break and I finally start my chemistry project and studying for my chem test #procrastinationaf                                                                                                                                                                                                                                                                                                                                                                                                                                                                                                                                                                                                                                                                        |   |   |   | X |   |
| 164 | Calc test today, chem test, and lab chem exam tomorrow :( pls help                                                                                                                                                                                                                                                                                                                                                                                                                                                                                                                                                                                                                                                                                                                             |   |   | X |   |   |
| 165 | hard to study for a chemistry test when you have no chemistry notes!!!!!!!                                                                                                                                                                                                                                                                                                                                                                                                                                                                                                                                                                                                                                                                                                                     |   |   | X |   |   |
| 166 | The only thing I'm going to know for the chem test tonight is my name and the date                                                                                                                                                                                                                                                                                                                                                                                                                                                                                                                                                                                                                                                                                                             | X |   | X |   |   |
| 167 | frig this chem test tomorrow :/                                                                                                                                                                                                                                                                                                                                                                                                                                                                                                                                                                                                                                                                                                                                                                |   |   |   |   | X |
| 168 | [Name redacted] your number #1 girl got an A on the hardest Stoichiometry (Chem) test! She's the whole package! [Name redacted]                                                                                                                                                                                                                                                                                                                                                                                                                                                                                                                                                                                                                                                                |   | X |   |   |   |
| 169 | I bet everything I write on this cheat note card will not be on this Chem test tomorrow...my luck.                                                                                                                                                                                                                                                                                                                                                                                                                                                                                                                                                                                                                                                                                             | X |   | X |   |   |
| 170 | Great now I have to do a online chemistry test..... wish me luck                                                                                                                                                                                                                                                                                                                                                                                                                                                                                                                                                                                                                                                                                                                               |   |   | X |   |   |
| 171 | When you tell Sara you have a chem test today and all she says is "well you're screwed good luck" #truefriend [Name redacted]                                                                                                                                                                                                                                                                                                                                                                                                                                                                                                                                                                                                                                                                  | X |   | X |   |   |
| 172 | Chem test weeeeeeeeeee â€” feeling silly at Jackaroo Landing <a href="http://t.co/ks83WDmYOL">http://t.co/ks83WDmYOL</a>                                                                                                                                                                                                                                                                                                                                                                                                                                                                                                                                                                                                                                                                       |   |   | X |   |   |
| 173 | I have a chem test tomorrow where you [Name redacted] with that school closing Wayne                                                                                                                                                                                                                                                                                                                                                                                                                                                                                                                                                                                                                                                                                                           |   |   |   | X |   |
| 174 | Not as nervous as I normally am for this Chem test <ed><U+00A0><U+00BD><ed><U+00B8><U+00B3>                                                                                                                                                                                                                                                                                                                                                                                                                                                                                                                                                                                                                                                                                                    |   | X |   |   |   |
| 175 | literally need to pass this chem test 2morrow<ed><U+00A0><U+00BD><ed><U+00B8><U+0085>                                                                                                                                                                                                                                                                                                                                                                                                                                                                                                                                                                                                                                                                                                          |   |   |   | X |   |
| 176 | NO HOPE FOR THIS CHEM TEST NONE AT ALL                                                                                                                                                                                                                                                                                                                                                                                                                                                                                                                                                                                                                                                                                                                                                         |   |   | X |   |   |
| 177 | how to fail a chem test: convince yourself you can do all the practice problems even though you can't                                                                                                                                                                                                                                                                                                                                                                                                                                                                                                                                                                                                                                                                                          |   |   | X |   |   |
| 178 | im not going to be on that much tonight, i have a lot of homework and i have a chemistry test tomorrow, and i need to study.                                                                                                                                                                                                                                                                                                                                                                                                                                                                                                                                                                                                                                                                   |   |   |   | X |   |
| 179 | I've never loved rain more in my entire life. Chem II lab test #CANCELED                                                                                                                                                                                                                                                                                                                                                                                                                                                                                                                                                                                                                                                                                                                       | X | X |   |   |   |
| 180 | I just remembered I have to study for a Chem test and do 2 reviews for algebra plus act prep homework & economics ÃÄ Ä½ÃÄ-ÃÄ Ä½ÃÄ Ä½ÃÄ,Ä                                                                                                                                                                                                                                                                                                                                                                                                                                                                                                                                                                                                                                                       |   |   |   | X |   |
| 181 | Cramming for this stupid Chem test <a href="http://t.co/pLE7AnzBYH">http://t.co/pLE7AnzBYH</a>                                                                                                                                                                                                                                                                                                                                                                                                                                                                                                                                                                                                                                                                                                 |   |   | X |   |   |
| 182 | I'm about to fail a test for the first time in my life. Pray that I pass chemistry.                                                                                                                                                                                                                                                                                                                                                                                                                                                                                                                                                                                                                                                                                                            |   |   | X |   |   |
| 183 | I HAVE A CHEM HISTORY MATH & SPANISH TEST TOMORROW WTF DID I DO TO DESERVE THIS                                                                                                                                                                                                                                                                                                                                                                                                                                                                                                                                                                                                                                                                                                                | X |   | X |   |   |
| 184 | [Name redacted] luke, i have a chemistry test tomorrow!! Do you want to help me study? Or we can just make out and dont study at                                                                                                                                                                                                                                                                                                                                                                                                                                                                                                                                                                                                                                                               |   |   |   | X |   |



|     |                                                                                                                                                                                                                                           |   |   |   |   |  |
|-----|-------------------------------------------------------------------------------------------------------------------------------------------------------------------------------------------------------------------------------------------|---|---|---|---|--|
|     | all                                                                                                                                                                                                                                       |   |   |   |   |  |
| 185 | I'm seriously stressing over this Chem test tomorrow!!                                                                                                                                                                                    |   |   | X |   |  |
| 186 | I promise I'll get my life together after this chem test tomorrow <ed><U+00A0><U+00BD><ed><U+00B8><U+0085>                                                                                                                                | X |   | X |   |  |
| 187 | PLEASE NO SCHOOL. no one is ready for this chemistry test Ã ÃÃ,â€                                                                                                                                                                     |   |   | X |   |  |
| 188 | Yeah Imma fail that Chem test tomorrow<ed><U+00A0><U+00BD><ed><U+00B1><U+008E><ed><U+00A0><U+00BC><ed><U+00BF><U+00BD>                                                                                                                    |   |   | X |   |  |
| 189 | When ur baby brother asks for u to come with him to something but you have a chem test :(                                                                                                                                                 | X |   | X |   |  |
| 190 | Better be a snow day tomorrow really not feelin this chem test                                                                                                                                                                            |   |   | X |   |  |
| 191 | Studyin for this Chemistry test tomorrow                                                                                                                                                                                                  |   | X |   |   |  |
| 192 | There is no hope for me on this chemistry test. <U+270C><ed><U+00A0><U+00BC><ed><U+00BF><U+00BC><U+FE0F>                                                                                                                                  |   |   | X |   |  |
| 193 | [Name redacted] *hands out chem test*<br>*starts crying**                                                                                                                                                                                 |   |   | X |   |  |
| 194 | Took my ap chem test, went home and took a big nap & woke up now what do I do now                                                                                                                                                         |   |   |   | X |  |
| 195 | Never have I ever felt this awful before.. & of course my first organic chem 2 test is in the morning<br><ed><U+00A0><U+00BD><ed><U+00B8><U+00B7><ed><U+00A0><U+00BD><ed><U+00B2><U+0089><ed><U+00A0><U+00BD><ed><U+00B2><U+008A>         |   |   |   | X |  |
| 196 | I actually felt confident walking out of my chem test. Just checked blackboard..Gonna have to get an A on the rest of the tests to pull a BÃ ÃÃ,â€                                                                                    |   | X |   |   |  |
| 197 | When class is cancelled and you had a chemistry test that dayÃ ÃÃ,ÃÃ ÃÃ,ÃÃ ÃÃ,ÃÃ #turnup                                                                                                                                     | X |   | X |   |  |
| 198 | I think I failed that chem test so I should just stay in Daytona and drop out of school<br><ed><U+00A0><U+00BD><ed><U+00B1><U+008B><ed><U+00A0><U+00BC><ed><U+00BC><U+00B4><U+2600><U+FE0F>                                               |   |   | X |   |  |
| 199 | nbd took my chem test all drugged up and prolly aced it still                                                                                                                                                                             | X |   | X |   |  |
| 200 | forgot about this chem test                                                                                                                                                                                                               |   |   |   | X |  |
| 201 | I should study for the chem test I have tomorrow but instead I'm going to a party lol fuck chem                                                                                                                                           |   |   |   | X |  |
| 202 | Chem test tomorrow is killing my vibe                                                                                                                                                                                                     |   |   | X |   |  |
| 203 | Now I regret writing blah blah blah on my notes. This chemistry test is going to send me to an earlyâ€   <a href="https://t.co/RCbRPibbfy">https://t.co/RCbRPibbfy</a>                                                                   | X |   | X |   |  |
| 204 | The only joke tomorrow is gonna be the grade I get on my chem test                                                                                                                                                                        | X |   | X |   |  |
| 205 | I'm dreading this AP Chem test on Monday since I know absolutely nothing, but I just cant bring myself to study<br><ed><U+00A0><U+00BD><ed><U+00B1><U+008E><ed><U+00A0><U+00BD><ed><U+00B8><U+00A3>                                       |   |   |   | X |  |
| 206 | This chem test is going to kill me #iwishwelearnedthis                                                                                                                                                                                    |   |   | X |   |  |
| 207 | [Name redacted] [Name redacted] [Name redacted] [Name redacted] It sounds like they should have done the chemistry test. Just saying.                                                                                                     |   |   |   | X |  |
| 208 | Whoever takes my chemistry test for me tomorrow can have this entire bowl of homemade cookie dough <a href="http://t.co/z2IIQK0E4i">http://t.co/z2IIQK0E4i</a>                                                                            | X |   | X |   |  |
| 209 | completely ignoring the fact that i have a math and chemistry test back to back tomorrow...#thestruggleisreal                                                                                                                             |   |   | X |   |  |
| 210 | I think I need a chemistry test tutor                                                                                                                                                                                                     |   |   |   | X |  |
| 211 | I know I've done shit on my chemistry test and I don't want to see my score                                                                                                                                                               |   |   | X |   |  |
| 212 | Watch me complain about how I didn't get enough time for a chemistry test I knew about 2 weeks in advance                                                                                                                                 |   |   | X |   |  |
| 213 | hope this chem test ain't that hard                                                                                                                                                                                                       |   |   |   | X |  |
| 214 | <U+203C><U+FE0F><ed><U+00A0><U+00BC><ed><U+00B6><U+0098><U+203C><U+FE0F><ed><U+00A0><U+00BC><ed><U+00B6><U+0098>IF YOU'RE GOOD AT CHEMISTRY AND WANT TO HELP ME PASS MY TEST THURSDAY AND MY FINAL NEXT WEEK TEXT/DM ME PLEASE I'LL BUY U |   |   |   | X |  |

|     |                                                                                                                                                                                                                                       |   |   |   |   |   |
|-----|---------------------------------------------------------------------------------------------------------------------------------------------------------------------------------------------------------------------------------------|---|---|---|---|---|
|     | FOOD<U+203C><U+FE0F><ed><U+00A0><U+00BC><ed><U+00B6><U+0098><U+203C><U+FE0F><ed><U+00A0><U+00BC><ed><U+00B6><U+0098>                                                                                                                  |   |   |   |   |   |
| 215 | English test monday and tuesday , chinese test tuesday , global test Wednesday and chem test Thursday<br><ed><U+00A0><U+00BD><ed><U+00B8><U+00B4>                                                                                     |   |   |   | X |   |
| 216 | The fact that i helped alex pass her chem test makes me super happy. Gosh I'm a great friend                                                                                                                                          |   | X |   |   |   |
| 217 | To my fellow AP chem friends who are taking the AP test tomorrow and are struggling #apchemproblems <a href="http://t.co/o7ozskQ82V">http://t.co/o7ozskQ82V</a>                                                                       |   | X |   |   |   |
| 218 | UGH I still have to study for my chemistry test tomorrow bc if it rains it could cancel my game                                                                                                                                       |   |   |   | X |   |
| 219 | I have a chemistry test tomorrow I know nothing on and I haven't studied yet ÃÂ Ã½ÃÂ±Ã                                                                                                                                                |   |   | X |   |   |
| 220 | Not feelin this chem test at 8                                                                                                                                                                                                        |   |   |   | X |   |
| 221 | Gonna fail my chem test tomorrow because I'm watching this game but I've excepted it                                                                                                                                                  |   |   | X |   |   |
| 222 | Well that chem test killed me. Ugh!!!                                                                                                                                                                                                 |   |   | X |   |   |
| 223 | who puts a chem test on a Monday                                                                                                                                                                                                      |   |   |   | X |   |
| 224 | Chemistry test tomorrow so<br>excited<ed><U+00A0><U+00BD><ed><U+00B8><U+0092><U+270B><ed><U+00A0><U+00BC><ed><U+00BF><U+00BC>                                                                                                         |   | X |   |   |   |
| 225 | today someone set off the fire alarm and I missed my chem test God bless                                                                                                                                                              |   |   | X |   |   |
| 226 | I spent all day doing a Spanish project that's due Wednesday when I have a test tomorrow in chem. Wow I don't think                                                                                                                   |   |   |   | X |   |
| 227 | crying bc chem test tomorrow and forgot to bring home my notes ÃÂ Ã½ÃÂ,Ã                                                                                                                                                              |   |   |   | X |   |
| 228 | Literally crying bc chem test tomorrow                                                                                                                                                                                                |   |   | X |   |   |
| 229 | I should study for that chem test tomorrow.                                                                                                                                                                                           |   |   |   | X |   |
| 230 | I didn't picture myself spending my birthday cramming for my AP chemistry test that I have at 7:30 am but here I am                                                                                                                   |   |   |   | X |   |
| 231 | when u have an ap chem and math test on the same day next week #thanksmercy                                                                                                                                                           |   |   |   |   | X |
| 232 | So can we please get out for snow tomorrow cuz I need an extra day to study AP chem before this test.... ÃÂ Ã½ÃÂ¹Ã                                                                                                                    | X |   | X |   |   |
| 233 | i have all A's rn i hope this chem test don't mess me up Friday                                                                                                                                                                       |   |   |   | X |   |
| 234 | Chem test time ... I sense #beer in my future lol                                                                                                                                                                                     | X |   |   |   | X |
| 235 | lawd the fact that I have a chem test AND a history quiz tomorrow<br><ed><U+00A0><U+00BD><ed><U+00B8><U+0095><ed><U+00A0><U+00BD><ed><U+00B8><U+0095><ed><U+00A0><U+00BD><ed><U+00B8><U+0095><ed><U+00A0><U+00BD><ed><U+00B8><U+0095> |   |   |   |   | X |
| 236 | [Name redacted] person:OMG YOU DIDN'T STUDY FOR THE TEST???!?!?!<br>me:nope<br>person:BUT HOW ARE YOU GONNA PASS???<br>me:I'm notâ€Chem                                                                                               |   |   |   | X |   |
| 237 | no point in studying for my chemistry test tomorrow considering i've only passed one this year                                                                                                                                        |   |   | X |   |   |
| 238 | [Name redacted] no no the worst is not over I still have my Chem test. Tomorrow the worst will be over and bae comes home<br>#everyoneshappy ÃÂ Ã½ÃÂ,Ã                                                                                |   |   | X |   |   |
| 239 | Excuse me, why is there a chem test tomorrow??                                                                                                                                                                                        |   |   |   | X |   |
| 240 | I'm really appalled by the fact I have to take a practice AP Chem test tomorrow...                                                                                                                                                    |   |   | X |   |   |
| 241 | that chemistry test killed me <ed><U+00A0><U+00BD><ed><U+00B8><U+00AA>                                                                                                                                                                |   |   | X |   |   |
| 242 | Ya girl got a 108 on her Chemistry test! #callmeascientist <ed><U+00A0><U+00BD><ed><U+00B2><U+00AF>                                                                                                                                   |   | X |   |   |   |
| 243 | All I have to do is finish my paper, do bio pre lab and then i can dedicate all my time to studying for my chemistry test                                                                                                             |   |   |   | X |   |
| 244 | No freaking way. I got an 81 on a chemistry test I didn't study for and had NO CLUE how to do anything. #blessed                                                                                                                      | X | X |   |   |   |
| 245 | I get to the classroom where my Chem test is 15 min early and it's already almost completely full                                                                                                                                     |   |   |   | X |   |

|     |                                                                                                                                                                                                     |   |   |   |   |   |
|-----|-----------------------------------------------------------------------------------------------------------------------------------------------------------------------------------------------------|---|---|---|---|---|
| 246 | I'm hype i'm getting out of a chem test and lab tomorrow!<ed><U+00A0><U+00BD><ed><U+00B9><U+008C>                                                                                                   | X |   | X |   |   |
| 247 | I got an A on every SECTION OF MY CHEM TEST IM AO PROUD OF YMSELF                                                                                                                                   |   | X |   |   |   |
| 248 | And I have a chem test and a quiz in biomed tomorrow like <ed><U+00A0><U+00BD><ed><U+00B8><U+0090>                                                                                                  | X |   |   |   | X |
| 249 | #SophomoreYearIn5Words "when are chem test retakes?"                                                                                                                                                |   |   |   | X |   |
| 250 | S/o to all the brave souls out there taking the AP Chem test tomorrow #Godspeed                                                                                                                     | X |   |   |   | X |
| 251 | If I pass this chem test Monday I will cry with tears of joy                                                                                                                                        |   | X |   |   |   |
| 252 | prepared to fail the chem test                                                                                                                                                                      |   |   | X |   |   |
| 253 | So we have a chem test tomorrow, and another one Friday. Cool                                                                                                                                       |   |   |   | X |   |
| 254 | I DONT KNOW WHATS GOING TO BE ON MY CHEM TEST TOMORROW AND ONE OF MY ONLY FRIENDS IN THAT CLASS CANT TALK HELP                                                                                      |   |   | X |   |   |
| 255 | On a scale of 1 to phys chem how unprepared am I for this psych test tomorrow? ...let's not talk about it. <ed><U+00A0><U+00BD><ed><U+00B8><U+00B6>                                                 | X |   | X |   |   |
| 256 | How unlikely is it for us to get a cancellation because I really don't want to have to take this gosh darned Chem test                                                                              | X |   | X |   |   |
| 257 | I have to study for this chem test and still finish my homework...but there's Netflix...                                                                                                            |   |   |   | X |   |
| 258 | And studying for this Chem test.                                                                                                                                                                    |   |   |   | X |   |
| 259 | [Name redacted] you do your chem test alr? this week got chem, mt, physics i think and math                                                                                                         |   |   |   | X |   |
| 260 | [Name redacted] thanks girl!! It's not the chem w/the lab it's the one for education so I don't have a lab but the test was still challenging                                                       |   | X |   |   |   |
| 261 | OMFG I GOT A 98 ON MY CHEMISTRY TEST IS THE WORLD ENDING OR?????                                                                                                                                    |   | X |   |   |   |
| 262 | When you bomb your chem test <ed><U+00A0><U+00BD><ed><U+00B8><U+0082><ed><U+00A0><U+00BD><ed><U+00B8><U+0085> https://t.co/4TqeTHJY9E                                                               | X |   |   |   | X |
| 263 | Good day: Got an A on my Chem test and Chipotle now delivers<ed><U+00A0><U+00BD><ed><U+00B8><U+008D><U+2764><U+FE0F><ed><U+00A0><U+00BD><ed><U+00B8><U+00AD>                                        | X | X |   |   |   |
| 264 | i have a chemistry test tomorrow but i honestly dont give a fuck so im not gonna study                                                                                                              |   |   |   | X |   |
| 265 | Going to TACKLE the chem test & math midterm tomorrow <ed><U+00A0><U+00BD><ed><U+00B2><U+00AA><ed><U+00A0><U+00BD><ed><U+00B8><U+008C>                                                              |   | X |   |   |   |
| 266 | Well. That chem test was graded...glad one is dropped. #2moretests #ihatecollege                                                                                                                    |   | X |   |   |   |
| 267 | I wonder if the person grading my AP chem test will count the tears on my answer sheet, because one had to have landed on the right answer.                                                         | X |   | X |   |   |
| 268 | Charlie Charlie, am I passing the Chem test tommorow?<br>no   yes<br>--<U+270F><U+FE0F>--<br>yes   no                                                                                               |   |   |   |   | X |
| 269 | I'm being a good student and I'm bringing my chemistry to drivers Ed so when I finish my temps test I can study for my chem test.                                                                   |   |   |   | X |   |
| 270 | [Name redacted] have one saying "I screwed sahil over on a chem test"                                                                                                                               |   |   | X |   |   |
| 271 | Decent lil Wednesday. I believe I passed my Chem test, I Aced my AP English Test, and Took a L on Johnson note quiz<ed><U+00A0><U+00BD><ed><U+00B8><U+0085><ed><U+00A0><U+00BD><ed><U+00B8><U+0085> |   | X |   |   |   |
| 272 | Yeah not feeling this AP chem test tomorrow                                                                                                                                                         |   | X |   |   |   |
| 273 | I've literally been sitting waiting for this chem test for 6 hours                                                                                                                                  |   |   |   | X |   |
| 274 | You know it's a bad chemistry test when you start swearing at hydrogen under your breath                                                                                                            | X |   | X |   |   |
| 275 | We passed our last chem test with flying colors [Name redacted] <ed><U+00A0><U+00BC><ed><U+00BC><U+0088><ed><U+00A0><U+00BC><ed><U+00BE><U+0093>                                                    |   | X |   |   |   |

|     |                                                                                                                                                                                                                                |   |   |   |   |   |
|-----|--------------------------------------------------------------------------------------------------------------------------------------------------------------------------------------------------------------------------------|---|---|---|---|---|
| 276 | Chem test over time to enjoy the weekend oh wait I have a test Monday and Tuesday                                                                                                                                              | X |   |   |   | X |
| 277 | Alright this awesome weather has screwed me... Been outside all day and now I have a research paper I need to do and a Chem test tmrw. <ed><U+00A0><U+00BD><ed><U+00B2><U+00A9>                                                |   |   | X |   |   |
| 278 | The AP chem test is in one month [Name redacted]                                                                                                                                                                               |   |   |   | X |   |
| 279 | GUYS I ACED MY HONORS BIO CHEM TEST AJAJNSJSNSBS                                                                                                                                                                               |   | X |   |   |   |
| 280 | That chem test tomorrow is gonna be the death of me.                                                                                                                                                                           |   |   | X |   |   |
| 281 | Making wishes on eyelashes to do really well on my chemistry test tomorrow.                                                                                                                                                    | X |   |   |   | X |
| 282 | When I saw my chem test was 60 mc questions + 5 pages front and back worth of free response. <a href="https://t.co/Ad0ROKzl15">https://t.co/Ad0ROKzl15</a>                                                                     | X |   | X |   |   |
| 283 | i hope who ever's parents complained about the chemistry project is happy now bc now we have a project AND a semester exam test                                                                                                | X |   | X |   |   |
| 284 | When you totally don't fail a Chemistry test! Like I can deal with a B. I have a saint as a friend! ÃÂ Â½ÃÂ¹Ã'                                                                                                                 |   | X |   |   |   |
| 285 | Honestly there's no point in me studying for this chem test considering how low the grades I get WITH studying are                                                                                                             |   |   | X |   |   |
| 286 | I got a 100 on my chemistry test and I really don't know how                                                                                                                                                                   |   | X |   |   |   |
| 287 | So excited for that 30% I'm going to get on the Chem test tomorow<ed><U+00A0><U+00BD><ed><U+00B2><U+0093><U+263A><U+FE0F>                                                                                                      |   | X |   |   |   |
| 288 | Soo ready to fail this chem test tom.<ed><U+00A0><U+00BD><ed><U+00B8><U+008A>                                                                                                                                                  |   |   | X |   |   |
| 289 | T-minus 22 hours till my Formal Lab Report for Chem is due(minimum 6 pgs) along with having a Bio test in the morning. Anxiety off the chart                                                                                   |   |   |   | X |   |
| 290 | Got a 87% on my Chem test officially bringing my D to a solid 70%. I'm so proud of me                                                                                                                                          | X | X |   |   |   |
| 291 | [Name redacted] our chem test is open note now?                                                                                                                                                                                |   |   |   | X |   |
| 292 | Chemistry test tomorrow will be the death of me                                                                                                                                                                                |   |   | X |   |   |
| 293 | Good luck on your chemistry test. Break the covalent bond! ÃÂ Â½ÃÂ,â€š                                                                                                                                                         | X |   |   | X |   |
| 294 | I think I'm prepared for this chemistry test, then I'll actually take the test and realize I know nothing ÃÂ Â½ÃÂ¹Ã+ÃÂ Â½ÃÂ,â€œ                                                                                                |   |   | X |   |   |
| 295 | When your Chem teacher gives u a test review but didn't teach or even mention literally 75% of it                                                                                                                              |   |   |   | X |   |
| 296 | pls #closefcps I refuse to take another test in Chem HL in under 90 minutes if there is only a 2 hour delay                                                                                                                    |   |   |   | X |   |
| 297 | [Name redacted] yes, go study ur noodles, hopefully thatll b on ur ap chem test                                                                                                                                                | X |   |   | X |   |
| 298 | I'm gonna need a 3 day nap to recover from the ap chem test on Monday.                                                                                                                                                         | X |   | X |   |   |
| 299 | Praying for a snow day just because I don't wanna take my chemistry test ÃÂ Â½ÃÂ¹Ã                                                                                                                                             |   |   |   | X |   |
| 300 | Studying with michael so he gets me sick and I dont have to take this chem test                                                                                                                                                |   |   | X |   |   |
| 301 | I actually really need to go to school tmr so I can take my chem test                                                                                                                                                          |   |   |   | X |   |
| 302 | Watching [Name redacted] before my AP Chemistry test tomorrow is making studying a lot more enjoyable <ed><U+00A0><U+00BD><ed><U+00B8><U+008A><ed><U+00A0><U+00BD><ed><U+00B8><U+008A><ed><U+00A0><U+00BD><ed><U+00B8><U+008A> |   | X |   |   |   |
| 303 | In 7 days I'll have failed the AP Chem test, but in 7 days I'll never have to study it again so...<ed><U+00A0><U+00BC><ed><U+00BE><U+0089><ed><U+00A0><U+00BD><ed><U+00B1><U+008F>                                             | X |   | X |   |   |
| 304 | [Name redacted] Yeahh BUT I MISS YOU TOO AVA AND IS THE CHEM TEST AND QUIZ EASY?!                                                                                                                                              |   |   |   | X |   |
| 305 | [Name redacted] this is extremely ironic considering i just got a 42 on my chem test                                                                                                                                           |   |   |   | X |   |
| 306 | can I just take this chemistry test already so my summer can begin??                                                                                                                                                           |   |   |   | X |   |
| 307 | [Name redacted] studying for my chem test. nothing too exciting                                                                                                                                                                |   |   |   | X |   |
| 308 | About to be crucified for doing bad on one chemistry test                                                                                                                                                                      | X |   | X |   |   |
| 309 | Wait i have test on monday And i still don't know anything Of maths and chemistry                                                                                                                                              |   |   | X |   |   |

|     |                                                                                                                                                                                                                                       |   |   |   |   |
|-----|---------------------------------------------------------------------------------------------------------------------------------------------------------------------------------------------------------------------------------------|---|---|---|---|
|     | <ed><U+00A0><U+00BD><ed><U+00B8><U+0082>                                                                                                                                                                                              |   |   |   |   |
| 310 | <ed><U+00A0><U+00BD><ed><U+00B8><U+00B1> OMG I forgot I had a chemistry test tomorrow!                                                                                                                                                |   |   | X |   |
| 311 | I have to take the makeup chem test tomorrow and I have never been so fucked                                                                                                                                                          |   |   | X |   |
| 312 | I have a chemistry test that I really really need to study for                                                                                                                                                                        |   |   |   | X |
| 313 | For once, I think I might actually know what I'm doing going into this chem test<ed><U+00A0><U+00BD><ed><U+00B8><U+0081><ed><U+00A0><U+00BD><ed><U+00B9><U+008A>                                                                      |   | X |   |   |
| 314 | Got 3answers wrong in my chemistry test ÃÂ Â½ÃÂ²â€ÃÂ Â½ÃÂ,â€ž                                                                                                                                                                         |   |   |   | X |
| 315 | me taking my chemistry test today <a href="http://t.co/qcSG7hMQLu">http://t.co/qcSG7hMQLu</a>                                                                                                                                         | X |   |   | X |
| 316 | praying we don't have school tomorrow so I don't have to take this Chemistry test<ed><U+00A0><U+00BD><ed><U+00B8><U+00A9>                                                                                                             |   |   |   | X |
| 317 | Tomorrows the last chem test.<ed><U+00A0><U+00BD><ed><U+00B3><U+009D><ed><U+00A0><U+00BD><ed><U+00B1><U+008F><ed><U+00A0><U+00BC><ed><U+00BF><U+00BC><ed><U+00A0><U+00BD><ed><U+00B1><U+008F><ed><U+00A0><U+00BC><ed><U+00BF><U+00BC> |   | X |   |   |
| 318 | chemistry test tomorrow, fuckin' perfect                                                                                                                                                                                              |   | X |   |   |
| 319 | "Do you ever make small mistakes in reading that just throw everything off?"<br>"Yes it's called a Chem test"                                                                                                                         | X |   | X |   |
| 320 | [Name redacted] GELI, come celebrate with me! I got my first 100 on a chemistry test! ÃÂ Â½ÃÂ,ÃÂÃÂ Â½ÃÂ,ÃÂÃÂ Â½ÃÂ,ÃÂÃÂ Â½ÃÂ-ÃÂ'ÃÂÃÂ Â½ÃÂ'ÃÂÃÂ Â½ÃÂ'ÃÂ                                                                                 |   | X |   |   |
| 321 | Just remember that I have a big Chemistry test tomorrow and I still have to study<ed><U+00A0><U+00BD><ed><U+00B8><U+0092><ed><U+00A0><U+00BD><ed><U+00B8><U+00AD><ed><U+00A0><U+00BD><ed><U+00B8><U+00A9>                             |   |   |   | X |
| 322 | actually screwed for this honors chemistry test bc I can't do anything                                                                                                                                                                |   |   | X |   |
| 323 | We just went over the Chem test in recitation without knowing what we got and I got no questions right that we went over i'm screaming                                                                                                |   |   | X |   |
| 324 | People taking the AP Chem test today <a href="http://t.co/PpZkf7j3P9">http://t.co/PpZkf7j3P9</a>                                                                                                                                      |   |   |   | X |
| 325 | [Name redacted] wait we have a chem test?                                                                                                                                                                                             |   |   |   | X |
| 326 | [Name redacted] lool I remember on my ap chem test I drew all 3 kanto starters on a problem ÃĈâ,-Ã“in exchange for wasting ur time on this problemÃĈâ,-Ã                                                                              |   |   |   | X |
| 327 | Lmao we finally finish our exams, chem teacher gives us a project that we have to do on our lunch breaks and gives us a test tomorrow -.-                                                                                             |   |   |   | X |
| 328 | Knowing I'm not ready for my chemistry test tomorrow morning sucks ass and balls.                                                                                                                                                     |   |   | X |   |
| 329 | When you get 100% on both your AP Calc and AP Chem test <ed><U+00A0><U+00BD><ed><U+00B1><U+008C> #GodIsOnMySide                                                                                                                       |   | X |   |   |
| 330 | [Name redacted] Wow so B day people are taking the chem test on Monday? I'm mad afâ€ same. sucks to suck.                                                                                                                             |   |   | X |   |
| 331 | When you're trying to pretend it's summer but then you remember you have a chemistry test tomorrow                                                                                                                                    | X |   | X |   |
| 332 | Netflix is down.. Probably my cue to start studying for my Chem test ÃÂ Â½ÃÂ'ÃÂ-ÃÂ Â½ÃÂ³Ãĵ                                                                                                                                            |   |   |   | X |
| 333 | kinda wanted the chem test tomorrow Tho JUSY to get it over with                                                                                                                                                                      |   | X |   |   |
| 334 | About to take my 1st chem test prayers are being accepted now :))))))                                                                                                                                                                 | X |   | X |   |
| 335 | [Name redacted] [Name redacted] [Name redacted] After chemistry today I'm scared of every test nowÃÂ Â½ÃÂ,â€ÃÂ Â½ÃÂ,Ã©                                                                                                                |   |   | X |   |
| 336 | it's a good thing i studied my chem packet so that the test was totally different<ed><U+00A0><U+00BD><ed><U+00B8><U+0084><ed><U+00A0><U+00BD><ed><U+00B8><U+0084><ed><U+00A0><U+00BD><ed><U+00B8><U+0084>                             | X |   |   | X |
| 337 | Ready to fail this chemistry test and just get it the fuck over with                                                                                                                                                                  | X |   | X |   |

|     |                                                                                                             |  |  |   |   |   |
|-----|-------------------------------------------------------------------------------------------------------------|--|--|---|---|---|
| 338 | r.i.p. anyone who took that chemistry test                                                                  |  |  | X |   |   |
| 339 | [Name redacted] This 2 day Chem test is killing me <ed><U+00A0><U+00BD><ed><U+00B8><U+0081>â€ need help pal |  |  | X |   |   |
| 340 | Junior speech first period...Chem test last period. Someone kill me please                                  |  |  | X |   |   |
| 341 | Did the calculations and I know that I got at least a 32 on my chem test                                    |  |  |   | X |   |
| 342 | Don't even know how I passed that chem test today                                                           |  |  | X |   |   |
| 343 | sooo about this chemistry test tomorrow <ed><U+00A0><U+00BD><ed><U+00B8><U+0085>                            |  |  |   |   | X |
| 344 | Does anyone remember wen the chemistry test is? ÃÂ Â½ÃÂ²Ã                                                   |  |  |   | X |   |

## Classification of the tweets sample containing the term “teacher” from Learning Environment topic

Note: Twitter user names have been replaced by “[Name redacted]” in the tweets to keep users anonymity

| Number | Tweet                                                                                                                                                                                                                                                                                                    | IRONY | POSITIVE | NEGATIVE | NEUTRAL | UNKNOWN |
|--------|----------------------------------------------------------------------------------------------------------------------------------------------------------------------------------------------------------------------------------------------------------------------------------------------------------|-------|----------|----------|---------|---------|
| 1      | My chemistry teacher actually didn't say my first name wrong during attendance...I mean I told her before but still lol                                                                                                                                                                                  | X     |          |          | X       |         |
| 2      | when u find out your chem teacher is a part time masseuse <a href="http://t.co/Z0xaddU3fe">http://t.co/Z0xaddU3fe</a>                                                                                                                                                                                    | X     |          |          | X       |         |
| 3      | Speaking of Sudafed, it's essentially just really mild meth. Or so said my high school Chem teacher, Mr. Kadle.                                                                                                                                                                                          |       |          |          | X       |         |
| 4      | My chemistry teacher's handwriting, it makes me cringe! <a href="http://t.co/2XyPIA3eWA">http://t.co/2XyPIA3eWA</a>                                                                                                                                                                                      |       |          | X        |         |         |
| 5      | Next semester's goal: become bio/chem teacher's pet so I have good references/connections later on ÆÆ Æ½ÆÆ, Æ¼                                                                                                                                                                                           |       |          |          | X       |         |
| 6      | My chemistry teacher is making his own formulas and testing us on it... Is that allowed?                                                                                                                                                                                                                 |       |          |          | X       |         |
| 7      | [Name redacted] I started making squealing noises in Chemistry today while reading Never Fade cause Chubs is back!.. Teacher doesn't approveÆÆ Æ¼ÆÆ, Æ¼                                                                                                                                                  |       |          | X        |         |         |
| 8      | I love how my chem teacher even knows about how much of a crazy person I am                                                                                                                                                                                                                              |       | X        |          |         |         |
| 9      | whY THE FUCK WOULD YOU GIVE US HOMEWORK THE DAY BEFORE A TEST THAT ISN'T EVEN RELEVANT TO ANYTHING WE HAVE LEARNED [Name redacted] CHEM TEACHER                                                                                                                                                          |       |          | X        |         |         |
| 10     | My step-dad could win an award for pissing me off more than my chemistry teacher                                                                                                                                                                                                                         | X     |          | X        |         |         |
| 11     | [Name redacted] ok but the new semester started over a month ago and my Chem teacher still hasn't published grades I gtg                                                                                                                                                                                 |       |          |          | X       |         |
| 12     | Chemistry teacher really expects us to do this packet.                                                                                                                                                                                                                                                   |       |          |          | X       |         |
| 13     | IM GOING TO FUCKING KILL MYSELF BC I JUST REALIZED IM HAVING THE STUPID CHINESE CHEM TEACHER WHOSE CLASS IS SO HARD                                                                                                                                                                                      |       |          | X        |         |         |
| 14     | I also remember the time my chemistry teacher ripped up someone's work because they found the correct answer in the textbook                                                                                                                                                                             |       |          |          | X       |         |
| 15     | My chem teacher started class by showing us the band that he's in Facebook page.                                                                                                                                                                                                                         |       |          |          | X       |         |
| 16     | So the chem teacher can't find his HCL for the demo tomorrow and I can't finish writing/printing the program until he does #principalprobs                                                                                                                                                               |       |          |          | X       |         |
| 17     | my chem teacher put my midterm grade on my report card and when my dad sees it im gonna get in so much trouble i hate my life                                                                                                                                                                            |       |          | X        |         |         |
| 18     | *chem teacher talking about kids putting weed in rice krispies & eating them at school*<br>**gasp* Who would do such a profound thing????                                                                                                                                                                | X     |          | X        |         |         |
| 19     | "Don't fall in love with someone who doesn't plan on staying around for a long time." Ayee my Chem teacher b preachin                                                                                                                                                                                    |       |          |          | X       |         |
| 20     | My Chemistry teacher husband is laughing at the unbelievability of the chemicals/colors in this class. #TheDuff                                                                                                                                                                                          |       |          |          | X       |         |
| 21     | Lol when you chem teacher gives you extra credit and she can't even come up with her own questions... Thanks google you the real MVP<br><ed><U+00A0><U+00BD><ed><U+00B8><U+0082><ed><U+00A0><U+00BD><ed><U+00B9><U+008B><ed><U+00A0><U+00BD><ed><U+00B2><U+0081><ed><U+00A0><U+00BD><ed><U+00B1><U+008C> | X     |          | X        |         |         |
| 22     | [Name redacted] My chem teacher said if we get 5000 RTs we can take a 25 question exam, look out fam<br><ed><U+00A0><U+00BD><ed><U+00B8><U+0085> <a href="http://t.co/mnbUrgvCKj">http://t.co/mnbUrgvCKj</a> " sounds smart                                                                              |       |          |          | X       |         |
| 23     | My chemistry teacher keeps trying to push AP chem. <a href="http://t.co/MH3Inj2Pyy">http://t.co/MH3Inj2Pyy</a>                                                                                                                                                                                           |       |          |          | X       |         |
| 24     | my ap chemistry teacher is a fucking mess                                                                                                                                                                                                                                                                |       |          | X        |         |         |
| 25     | Michael just sent Gaz naked snapchat to his chemistry teacher by accident <ed><U+00A0><U+00BD><ed><U+00B8><U+0082>                                                                                                                                                                                       |       |          |          | X       |         |
| 26     | Lol I think I should be nice to my chemistry teacher                                                                                                                                                                                                                                                     |       | X        |          |         |         |
| 27     | And the worst is my four hours of chemistry class where my teacher teaches nothing and just stay talking how she's great and we know nothing                                                                                                                                                             |       |          | X        |         |         |

|    |                                                                                                                                                                                             |   |   |   |   |   |
|----|---------------------------------------------------------------------------------------------------------------------------------------------------------------------------------------------|---|---|---|---|---|
| 28 | my chemistry teacher really needs to go back to college shes acting like shes in high school messing with my grades pissed off                                                              |   |   | X |   |   |
| 29 | #High #School Chemistry Teacher: UAE (Sharjah) ? A Formula for Success needed! #jobs <a href="http://t.co/JDUZBsRKKt">http://t.co/JDUZBsRKKt</a>                                            |   |   |   |   | X |
| 30 | Gotta say, more unexpected than "chemistry teacher." <a href="https://t.co/INwNBVMlyR">https://t.co/INwNBVMlyR</a>                                                                          | X |   |   |   | X |
| 31 | Need a part time job in the Martinez, CA area & degreed in Organic Chemistry? Experience as a tutor/teacher?-Click: <a href="http://t.co/RK9Cb0ziH6">http://t.co/RK9Cb0ziH6</a>             |   |   |   | X |   |
| 32 | Can't believe my Chem teacher use my own word on meeeee like really nigga <a href="https://t.co/AA_AAA_AAA">AA_AAA_AAA</a>                                                                  |   |   | X |   |   |
| 33 | [Name redacted] because not every chemistry teacher is a gangster unless miss oliver has something shes not telling us                                                                      | X |   | X |   |   |
| 34 | [Name redacted] tgis is long, but a great story. I had a chem teacher who was a complete whack job. we did experiments for a project once...                                                |   |   |   | X |   |
| 35 | [Name redacted] [Name redacted] It has a lot to do with the teacher - horrible chem teacher (hate), awesome physics teacher (love) - got Cs in both                                         |   |   | X |   |   |
| 36 | My chem teacher be giving ridiculous amounts of homework. <a href="https://t.co/AA_AAA_AAA">AA_AAA_AAA</a>                                                                                  |   |   | X |   |   |
| 37 | Today in chem my teacher wrote do and I totally read it as D.O I'm in too deep, and omg he's probably dating that one girl from girls day. <a href="https://t.co/AA_AAA_AAA">AA_AAA_AAA</a> | X |   |   |   | X |
| 38 | I'm playing league with my Chem teacher <a href="http://t.co/YKMmz7z1ZG">http://t.co/YKMmz7z1ZG</a>                                                                                         |   |   |   |   | X |
| 39 | I am so pissed off at myself my chem teacher put our first test grade in and I fucking got a 54% I am so Fucking mad                                                                        |   |   | X |   |   |
| 40 | No idea if this is going to be any good, but had to buy it for my chemistry teacher wife. <a href="http://t.co/u9YefnH9Ga">http://t.co/u9YefnH9Ga</a>                                       |   |   |   | X |   |
| 41 | my chemistry teacher is going to watch age of ultron on thursday night <ed><U+00A0><U+00BD><ed><U+00B8><U+00A9>                                                                             | X |   |   | X |   |
| 42 | MY CHEMISTRY TEACHER WONT STOP TALKING ABOUT BOHR I CANT STAND IT ANYMORE                                                                                                                   |   |   | X |   |   |
| 43 | Sir Salman = sorry...but Sir Shahid is gonna be ur chem teacher in A2 (confirmed once again) [Name redacted]                                                                                |   |   |   | X |   |
| 44 | I love how my tennis coach is also my chemistry teacher.. Coach Nguyen is seriously the nicest person ever                                                                                  |   | X |   |   |   |
| 45 | My chemistry lab has nothing but girls in it except for the teacher! #NeverHappenedBefore                                                                                                   |   | X |   |   |   |
| 46 | [Name redacted] [Name redacted] I saw that happen to my high school chemistry teacher.                                                                                                      |   |   |   | X |   |
| 47 | Can I tell my chemistry teacher that my urine has a pH of 7? Will she find this exciting??                                                                                                  | X |   |   | X |   |
| 48 | Well my Chem teacher finally made me cry. About time                                                                                                                                        |   |   | X |   |   |
| 49 | Radicalised chemistry teacher from Manchester intent on fighting for Isis and was prepared... <a href="http://t.co/GZYhTfgZCI">http://t.co/GZYhTfgZCI</a>                                   |   |   |   |   | X |
| 50 | guys psa I didn't fail my chem quiz my teacher just fucked up the grading. never been more relived                                                                                          |   |   | X |   |   |
| 51 | Our chemistry teacher told a girl to "fuck off". It's so funnnnyyyyyy because he's basically me if I become a teacher.                                                                      | X |   | X |   |   |
| 52 | [Name redacted] I thought he would be a chemistry teacher                                                                                                                                   |   |   |   | X |   |
| 53 | When your chem teacher thinks you copied off the person of you but you finished before them..                                                                                               | X |   |   | X |   |
| 54 | Wow my chemistry teacher really hoed my grade. 93 to 78 to 71. Bitch you've been gone with a pregnancy and had a sub that didn't teach shit!                                                |   |   | X |   |   |
| 55 | Not that I emailed my AP Chem teacher for help and I said thank you and she replied "no prob" <a href="https://t.co/AA_AAA_AAA">AA_AAA_AAA</a>                                              |   |   |   | X |   |
| 56 | When even your chem teacher won't respond to your texts <ed><U+00A0><U+00BD><ed><U+00B8><U+0085><ed><U+00A0><U+00BD><ed><U+00B8><U+0093>                                                    | X |   |   |   | X |
| 57 | wow my chem teacher called home & gave me a referral cause I "cheated " no bit I did not                                                                                                    |   |   |   | X |   |
| 58 | You know your chemistry teacher likes you when she gives you her number so you put her as a reference for job applications                                                                  |   | X |   |   |   |
| 59 | [Name redacted] I agree. In the beginning she was the cunt wife of a chem teacher and then transformed into the cunt wife of a meth dealer.                                                 |   |   |   | X |   |
| 60 | I spent most of prom night dancing with my chemistry teacher<ed><U+00A0><U+00BD><ed><U+00B8><U+0082>                                                                                        |   | X |   |   |   |
| 61 | [Name redacted] I sorta gave up. the two main characters just dont do it for me. a chem teacher with cancer being a drug dealer                                                             |   |   |   | X |   |





|     |                                                                                                                                                                                                       |   |   |   |   |
|-----|-------------------------------------------------------------------------------------------------------------------------------------------------------------------------------------------------------|---|---|---|---|
| 93  | I once emailed my chem teacher asking for help and accidentally emailed a guy who then asked if I could make meth w him. #EmailFail                                                                   |   |   | X |   |
| 94  | [Name redacted] I got told by my chemistry teacher I would never make a scientist.<br>I though, fuck you.<br>I'd like to shove my degree up her c**t.                                                 |   | X |   |   |
| 95  | So the best thing just happen in Chem. My teacher showed up and said do other class work i canâ€™t be bothered with u. #LOVEIT #FREE #LIFE                                                            | X |   |   |   |
| 96  | S/o to my chem teacher for teaching me all i need to know for the science section in trivia crack Ã‚Â½Ã‚Â„â€šÃ‚Â½Ã-<br>Ã‚â€šÃ‚cÃ“Ã’Ã-Ã_Ã_Ã_ÃcÃ“Ã’Ã-Ã_Ã_Ã_                                             |   |   | X |   |
| 97  | My chemistry teacher hasn't updated our grades and my grade is still a 65% and its making me uncomfortable and scared                                                                                 |   | X |   |   |
| 98  | #UnitedKingdom A Chemistry #teacher is required for a school in Barnet with a September 2015 start http://t.co/VVN5vK6ZIE                                                                             |   |   | X |   |
| 99  | [Name redacted] he isn't your Chem teacher anymore..                                                                                                                                                  |   |   | X |   |
| 100 | [Name redacted] chemistry teacher/baseball coach                                                                                                                                                      |   |   | X |   |
| 101 | Wow, I just realized all the questions my chem teacher does in class and puts on the unit tests are in the textbook :o                                                                                | X |   |   |   |
| 102 | The new chemistry teacher at the high school<br><ed><U+00A0><U+00BD><ed><U+00B8><U+008D><ed><U+00A0><U+00BD><ed><U+00B8><U+008D><ed><U+00A0><U+00BD><ed><U+00B8><U+008D>                              |   |   |   | X |
| 103 | When your chem teacher can't do a problem from your quiz because the student teacher wrote it                                                                                                         | X |   | X |   |
| 104 | [Name redacted] the Chem teacher is a real jerk #agreewiththevaleriegirl                                                                                                                              |   | X |   |   |
| 105 | Chemistry teacher.... My class teacher... Best lefty in school... Best chem.teacher... Baddo of life                                                                                                  |   |   |   | X |
| 106 | N difficult days are approaching my teacher said... the chemistry test tomorrow<br><ed><U+00A0><U+00BD><ed><U+00B8><U+008A><ed><U+00A0><U+00BD><ed><U+00B4><U+00AB>                                   | X |   | X |   |
| 107 | Still laughing at the fact that my chem teacher reminds me of Cash Ã‚Â½Ã‚Â„â€šÃ‚Â½Ã‚Â„â€šÃ‚Â½Ã‚Â„â€š                                                                                                  | X | X |   |   |
| 108 | Omg my Chem teacher is talking about entropy and I'm trying not to bust out laughing!                                                                                                                 |   | X |   |   |
| 109 | Not even taking the chemistry sol but I can verify that it indeed is because of the teacher<br><ed><U+00A0><U+00BD><ed><U+00B8><U+0085>                                                               |   |   | X |   |
| 110 | That very awkward moment when you see your Chem teacher working out... <ed><U+00A0><U+00BD><ed><U+00B8><U+0085>                                                                                       | X |   |   | X |
| 111 | My chemistry teacher always calling my house Tryna get me in trouble like Ã‚Â½Ã‚Â„Ã‚Â½Ã‚Â„Ã‚                                                                                                          |   | X |   |   |
| 112 | My chemistry teacher knew a guy liked me before the guy actually told me                                                                                                                              |   |   | X |   |
| 113 | Head of Main School and the best chemistry teacher<br><ed><U+00A0><U+00BC><ed><U+00BE><U+0089><ed><U+00A0><U+00BD><ed><U+00B9><U+008C><ed><U+00A0><U+00BC><ed><U+00BF><U+00BC> http://t.co/reNuohtw5s |   | X |   |   |
| 114 | trust my chem teacher to give me a test on lunar new years                                                                                                                                            |   |   | X |   |
| 115 | my chem teacher is the strictest guy ever but he spared us and moved the exam date until the wednesday after break                                                                                    | X |   |   |   |
| 116 | West Orange Chemistry Teacher Receives \$1000 Grant - http://t.co/gFl4PnqmKk http://t.co/y6OBmchFCZ                                                                                                   |   |   | X |   |
| 117 | My chem teacher told us to be honest in our food analysis journal then 5 mins later called out a girl for eating Doritos.. Fuck that                                                                  |   | X |   |   |
| 118 | The fact that my chem teacher stop teach from december mah guh just bawl tmw                                                                                                                          |   |   |   | X |
| 119 | Today my My Chemistry teacher told us that he dresses up as professor Snape every summer at a Harry Potter camp Ã‚Â½Ã‚Â„â€š                                                                           |   |   | X |   |
| 120 | I think if you're a chem teacher you're supposed to teach chem??? Not make your students learn everything by themselves<br>#ilykalapodakis #tnx                                                       |   | X |   |   |
| 121 | "A high school chem teacher who starts makin meth"<br><br>Probably the weirdest yet easiest way to explain Breaking Bad                                                                               |   | X |   |   |



|     |                                                                                                                                                                                                                                                                                                                                                             |   |   |   |   |   |
|-----|-------------------------------------------------------------------------------------------------------------------------------------------------------------------------------------------------------------------------------------------------------------------------------------------------------------------------------------------------------------|---|---|---|---|---|
| 153 | My chemistry teacher told me to add her on Facebook today and she just accepted. <ed><U+00A0><U+00BD><ed><U+00B8><U+008E> #pumpedstudenthere                                                                                                                                                                                                                |   |   |   | X |   |
| 154 | My chem teacher talking about solutions <ed><U+00A0><U+00BD><ed><U+00B8><U+00AD> http://t.co/TgLBdEy5ME                                                                                                                                                                                                                                                     | X |   |   |   | X |
| 155 | My chemistry teacher is literally ruining my life with all of this homework                                                                                                                                                                                                                                                                                 |   |   | X |   |   |
| 156 | "Police: Rogers Chemistry Teacher Arrested for Possession of Glass Meth Pipe" http://t.co/JHqMi0RX5h #BreakingBad                                                                                                                                                                                                                                           |   |   |   | X |   |
| 157 | Still laughing at the fact my chemistry teacher tried saying I cheated on a test yesterday.. Re-took it today & I aced it                                                                                                                                                                                                                                   | X |   |   | X |   |
| 158 | No one understands how happy I am about my chemistry teacher going away on maternity leave                                                                                                                                                                                                                                                                  | X |   | X |   |   |
| 159 | Props to my chem teacher for only teaching us 2% of what's in the finals packet ÃÂÃÂ,Æ'ÃÂÃÂ,Æ'ÃÂÃÂ,Æ'ÃÂÃÂ,Æ' [Name redacted] [Name redacted]                                                                                                                                                                                                |   |   |   | X |   |
| 160 | When your chemistry teacher gives you her number and tells you to leave her daily updates on "chemistry camp" <ed><U+00A0><U+00BD><ed><U+00B8><U+00AD><ed><U+00A0><U+00BD><ed><U+00B8><U+0085>                                                                                                                                                              | X |   |   |   | X |
| 161 | When your Chem teacher tells you that you better pray to get a B on the test from the smallest unit of the year?ÃÂ&lt;&lt;&lt;&lt;&lt;                                                                                                                                                                                                                    |   |   |   | X |   |
| 162 | When your chemistry teacher can't spell 'alcohol' .....                                                                                                                                                                                                                                                                                                     | X |   |   | X |   |
| 163 | lol of course my chem teacher would do this bc shes done this before :)))                                                                                                                                                                                                                                                                                   |   |   |   |   | X |
| 164 | It's Ramadan now and my high school chemistry teacher is still sending me Criminal Case requests on Facebook.                                                                                                                                                                                                                                               | X |   | X |   |   |
| 165 | Laawddd my chem lab teacher sound like my father... Accent and all....                                                                                                                                                                                                                                                                                      |   |   |   | X |   |
| 166 | instead of taking a quiz on chapter 10 in chemistry my teacher wants us to email him a funny youtube video                                                                                                                                                                                                                                                  |   |   |   | X |   |
| 167 | Today my chem teacher made us do this rly hard lab. And nobody got it. and we were freaking out.                                                                                                                                                                                                                                                            |   |   | X |   |   |
| 168 | Drop out of college. Contact your chemistry teacher from high school. Buy an RV. ... Get rich.                                                                                                                                                                                                                                                              |   |   |   | X |   |
| 169 | I just emailed my chem teacher a question which has literally nothing to do with her class, but me & a friend disagree on the answer                                                                                                                                                                                                                        |   |   |   | X |   |
| 170 | Teacher jobs York: Science â Chemistry Teacher http://t.co/8d9wuBNIVz                                                                                                                                                                                                                                                                                     |   |   |   | X |   |
| 171 | When your chem teacher tells you the 100 question review is due tomorrow, and she never mentioned it before<ed><U+00A0><U+00BD><ed><U+00B8><U+00A4><ed><U+00A0><U+00BD><ed><U+00B8><U+00A4><ed><U+00A0><U+00BD><ed><U+00B8><U+00A4><ed><U+00A0><U+00BD><ed><U+00B8><U+0091><ed><U+00A0><U+00BD><ed><U+00B8><U+0091><ed><U+00A0><U+00BD><ed><U+00B8><U+0091> | X |   |   |   | X |
| 172 | [Name redacted] OHMYGOD https://t.co/uJ03zdL2hh" I wish my high school chemistry teacher was this talented                                                                                                                                                                                                                                                  |   | X |   |   |   |
| 173 | Sudden Chemistry Between Teacher and Teen girl Ai Uehara http://t.co/RzTjqdmy9M 853 http://t.co/KjxOSPFgD1                                                                                                                                                                                                                                                  |   |   |   |   | X |
| 174 | [Name redacted] I think my worst teacher ever was an education professor. Best teachers ever were high school calc and chemistry                                                                                                                                                                                                                            |   | X |   |   |   |
| 175 | Our chem teacher was so dumb bruh. How tf we all have the same answers but different scoresÃÂÃÂ,â                                                                                                                                                                                                                                                     |   |   | X |   |   |
| 176 | my chem teacher gave us an assignment that's due tomorrow but some of these questions seem like they're missing parts??                                                                                                                                                                                                                                     |   |   | X |   |   |
| 177 | Probably won't be too fond of my chemistry teacher ÃÂÃÂ,â                                                                                                                                                                                                                                                                                             |   |   |   |   | X |
| 178 | my chem teacher & us history teacher stress me out so much and their classes are complete bs                                                                                                                                                                                                                                                                |   |   | X |   |   |
| 179 | parents: "why does ur chemistry teacher keep calling us saying he has to move u bc u talk with alansa so much ?!?!?" http://t.co/Ht6MoEGw2a                                                                                                                                                                                                                 |   |   |   | X |   |
| 180 | Bless my high school chemistry teacher for putting out a deflate-gate equation to solve on facebook. I forgot how much I missed that class.                                                                                                                                                                                                                 |   | X |   |   |   |
| 181 | Maybe if I influence my chem teacher to give me an A, it will work <ed><U+00A0><U+00BD><ed><U+00B8><U+0082>                                                                                                                                                                                                                                                 |   |   |   | X |   |
| 182 | my chemistry teacher needs to put in my grades <ed><U+00A0><U+00BD><ed><U+00B2><U+0086><ed><U+00A0><U+00BC><ed><U+00BF><U+00BC>                                                                                                                                                                                                                             |   |   |   | X |   |
| 183 | The step Chem teacher is at my house                                                                                                                                                                                                                                                                                                                        |   |   |   | X |   |



|     |                                                                                                                                                                                                                            |   |   |   |   |   |
|-----|----------------------------------------------------------------------------------------------------------------------------------------------------------------------------------------------------------------------------|---|---|---|---|---|
| 215 | Do you have any friends selling pharmaceuticals? â€” My old chemistry teacher Mr. White <a href="https://t.co/YsDikHaJTU">https://t.co/YsDikHaJTU</a>                                                                      |   |   |   | X |   |
| 216 | Lol channel 5 and channel 7 news are at the police station for that chemistry teacher, plainfield is so fun                                                                                                                |   |   |   | X |   |
| 217 | I had to bring cutouts for a project and my chem teacher just sorta <a href="http://t.co/ZANhmbhC52">http://t.co/ZANhmbhC52</a>                                                                                            |   |   |   | X |   |
| 218 | Boys I present to you drakes chem teacher [Name redacted] <a href="http://t.co/9cWBhMPE6W">http://t.co/9cWBhMPE6W</a>                                                                                                      | X |   | X |   |   |
| 219 | That moment when you see your Chem teacher at Chipotle ðŸ˜¸ ðŸ˜¸ ðŸ˜¸ ðŸ˜¸ ðŸ˜¸                                                                                                                                            |   |   |   | X |   |
| 220 | My chemistry teacher and me have some problems due to these FOUR PACKETS she gave us to do on the weekend of prom.                                                                                                         |   |   |   | X |   |
| 221 | When your Chem teacher puts a grade as a 0/20 because it's "missing" but she just hasn't graded it yet and it brings your grade to a D :-)                                                                                 | X |   | X |   |   |
| 222 | When I go ask my chemistry teacher to sign my permission slip in the morning she gone have some smart to say ðŸ˜¸ ðŸ˜¸ ðŸ˜¸ ðŸ˜¸ ðŸ˜¸                                                                                      |   |   | X |   |   |
| 223 | My chem teacher be like "OK only questions 1- 3 for hmwrk" Question #1.) Part A through Z                                                                                                                                  | X |   | X |   |   |
| 224 | Why does my chem teacher think that's the only class I take and give me so much homework ðŸ˜¸ ðŸ˜¸ ?                                                                                                                       |   |   | X |   |   |
| 225 | for real though today my chemistry teacher pretty much called half of my class stupid                                                                                                                                      |   |   | X |   |   |
| 226 | [Name redacted] I remember this one time I complained about being hungry, my chemistry teacher made us watch him eat a whole pizza                                                                                         |   |   | X |   |   |
| 227 | [Name redacted] yeah good idea! give the crazy chem teacher food to eat in a science lab room so she can kill me.<br>thx.<ed><U+00A0><U+00BD><ed><U+00B8><U+0092>                                                          |   |   |   | X |   |
| 228 | [Name redacted] [Name redacted] a drawing of my favourite chemistry teacher ;- ) Would love a re-tweet or message!<br><a href="http://t.co/5JCb7Er1uU">http://t.co/5JCb7Er1uU</a>                                          | X |   |   | X |   |
| 229 | Chemistry teacher planned to join Islamic State and commit multiple acts of murder - <a href="http://t.co/xtO8uFFsBo">http://t.co/xtO8uFFsBo</a> <a href="http://t.co/meqvEun3WW">http://t.co/meqvEun3WW</a>               |   |   |   | X |   |
| 230 | [Name redacted] positive it's the 5th sasa :( plus side new Chem teacher                                                                                                                                                   |   |   |   |   | X |
| 231 | Honestly my chem teacher gives me so much work that I think I might just not do it and drop out of school in general                                                                                                       |   |   | X |   |   |
| 232 | Lmao we finally finish our exams, chem teacher gives us a project that we have to do on our lunch breaks and gives us a test tomorrow -.-                                                                                  |   |   | X |   |   |
| 233 | my chemistry teacher is so perfect omg                                                                                                                                                                                     |   | X |   |   |   |
| 234 | [Name redacted] it's funny cause he's a chemistry teacher too                                                                                                                                                              |   |   |   |   | X |
| 235 | omg a guy in my math class was talking about this old chem teacher who handed out Burger King applications to kids who failed tests/quizzes                                                                                |   |   |   | X |   |
| 236 | [Name redacted] I am showing this to my chemistry teacher tomorrow                                                                                                                                                         |   |   |   | X |   |
| 237 | Tutorial went great ðŸ˜¸ ðŸ˜¸ ðŸ˜¸ ðŸ˜¸ ðŸ˜¸ my chem teacher the realest                                                                                                                                                   |   | X |   |   |   |
| 238 | When your failing chemistry and your teacher says be more enthusiastic [Name redacted] [Name redacted] [Name redacted]<br><a href="http://t.co/47CWjO9GM0">http://t.co/47CWjO9GM0</a>                                      | X |   |   | X |   |
| 239 | I'm happy af now cancel them classes ! Cause my chemistry teacher too pressed w his non English speaking ass ðŸ˜¸ ðŸ˜¸ ðŸ˜¸ ðŸ˜¸ ðŸ˜¸                                                                                      |   |   | X |   |   |
| 240 | [Name redacted] also whenever im in chemistry or maths lesson and the teacher wants us to think the voice in my head goes *cries*                                                                                          |   |   | X |   |   |
| 241 | my chem teacher is so obsessed with 3 idiots he makes the seniors watch it after we take the ap                                                                                                                            |   |   | X |   |   |
| 242 | My Chem teacher just call Francium the fat slut of the periodic table family ðŸ˜¸ ðŸ˜¸ ðŸ˜¸ ðŸ˜¸ ðŸ˜¸                                                                                                                      |   |   |   | X |   |
| 243 | [Name redacted] [Name redacted] [Name redacted] my Chem teacher was actually normal but my physics teacher is a nut job                                                                                                    |   |   | X |   |   |
| 244 | This dress color argument kinda situation reminds me of my chemistry class where we used to argue over the colors of chemicals w/our teacher                                                                               |   |   |   | X |   |
| 245 | My Chem teacher called my mom about the letter I wrote him for teacher appreciation day and said he would read it if he ever had a bad day<ed><U+00A0><U+00BD><ed><U+00B8><U+008A><ed><U+00A0><U+00BD><ed><U+00B2><U+009A> | X | X |   |   |   |
| 246 | so my chem teacher came in and told us if we didnt hand in our graded assignments we'll get a 0 and i did none                                                                                                             |   |   | X |   |   |
| 247 | My Chem teacher is trying to sell us college students his house... We could buy his house twice over with our debt<br><ed><U+00A0><U+00BD><ed><U+00B8><U+0082>                                                             | X |   |   | X |   |

|     |                                                                                                                                                                                                                                                                                                                                                  |   |   |   |   |   |
|-----|--------------------------------------------------------------------------------------------------------------------------------------------------------------------------------------------------------------------------------------------------------------------------------------------------------------------------------------------------|---|---|---|---|---|
| 248 | My chemistry teacher has never watched white chicks                                                                                                                                                                                                                                                                                              |   |   |   |   | X |
| 249 | Chemistry Teacher - North London - Secondary: Chemistry post within popular North London School ** Popular...<br>http://t.co/er2xklx6oc                                                                                                                                                                                                          |   |   |   | X |   |
| 250 | Chem teacher lady keeps farting in the middle of lectures                                                                                                                                                                                                                                                                                        |   |   | X |   |   |
| 251 | my life is so fucking boring my chem teacher text me everyday. and I can't even respond. http://t.co/C9onbreeUI                                                                                                                                                                                                                                  |   |   | X |   |   |
| 252 | Meet Sue Rothberg.....math and science teacher....<br>Sue Rothberg teaches science in Classical School, "Chemistry... http://t.co/RhAtwC47m5                                                                                                                                                                                                     |   |   |   | X |   |
| 253 | <U+2605> JOB ALERT <U+2605> #jobs #job #Pompano Beach - High School Chemistry/Biology Teacher http://t.co/ef1WjxYrXP <U+261C> view details <U+2605> #hr                                                                                                                                                                                          |   |   |   | X |   |
| 254 | when I go back to school on spring break and my chem teacher think it's cute to fuck with me https://t.co/VXse73jkub                                                                                                                                                                                                                             | X |   | X |   |   |
| 255 | Chemistry teacher piss me off more while                                                                                                                                                                                                                                                                                                         | X |   | X |   |   |
| 256 | this week: my Chem teacher invited me 2 a chem competition [Name redacted] calstate Fullerton, my history presentation went gr8, I got D on math test<br><ed><U+00A0><U+00BD><ed><U+00B8><U+009D><ed><U+00A0><U+00BD><ed><U+00B8><U+00A9><ed><U+00A0><U+00BD><ed><U+00B1><U+008A>                                                                |   |   |   | X |   |
| 257 | When my chem teacher showed me that I have a 93 average<br>https://t.co/tcAQcBaCQk                                                                                                                                                                                                                                                               | X |   |   |   | X |
| 258 | Radicalised chemistry teacher determined to fight for Isis<br>http://t.co/ncfw68rAKW http://t.co/gvQcdkRky1                                                                                                                                                                                                                                      |   |   |   | X |   |
| 259 | when your chem teacher makes the test exactly the same as the practice test<br><ed><U+00A0><U+00BD><ed><U+00B8><U+00AD><ed><U+00A0><U+00BD><ed><U+00B9><U+008C> #hallefuckinglujah                                                                                                                                                               | X |   |   |   | X |
| 260 | When your teacher is the only chem teacher to give a final                                                                                                                                                                                                                                                                                       | X |   |   |   | X |
| 261 | my chem teacher can eat my review book tomorrow                                                                                                                                                                                                                                                                                                  |   |   |   | X |   |
| 262 | I got excited bc my chem teacher said that we don't need our lab manual bc it's online but my TA requires a physical copy OF COURSE                                                                                                                                                                                                              |   | X |   |   |   |
| 263 | really hope this chemistry teacher is better than the last one                                                                                                                                                                                                                                                                                   |   |   |   | X |   |
| 264 | High-Speed Cameras Reveal Why Sodium Explodes in Water You might remember your chemistry teacher's explanation, but there's always been a                                                                                                                                                                                                        |   |   |   | X |   |
| 265 | [Name redacted] awe <ed><U+00A0><U+00BD><ed><U+00B8><U+0082> it was nice from them actually<br><ed><U+00A0><U+00BD><ed><U+00B8><U+0082> specially from my chemistry teacher :D maths and physics<br><ed><U+00A0><U+00BD><ed><U+00B8><U+0082> it was a relief<br><ed><U+00A0><U+00BD><ed><U+00B8><U+0085><ed><U+00A0><U+00BD><ed><U+00B8><U+0085> |   |   |   |   | X |
| 266 | U know ur a chem freak when u and ur chem teacher laugh at chemistry puns                                                                                                                                                                                                                                                                        | X |   |   | X |   |
| 267 | we finally have a chemistry teacher but at what cost                                                                                                                                                                                                                                                                                             |   | X |   |   |   |
| 268 | MY CHEM TEACHER IS THE REAL MVP FOR RASING MY GRADE                                                                                                                                                                                                                                                                                              |   | X |   |   |   |
| 269 | When you learn Chem from a YouTube video and not your chem teacher                                                                                                                                                                                                                                                                               | X |   |   |   | X |
| 270 | Praying to God my chemistry teacher boosts my grade.                                                                                                                                                                                                                                                                                             |   |   | X |   |   |
| 271 | Okay but Lemme explain me and my Chem teacher are good friends I bully him                                                                                                                                                                                                                                                                       |   |   | X |   |   |
| 272 | Chemistry Teacher: A talented Teacher of Chemistry, with excellent subject knowledge and the ability to teach ...<br>http://t.co/yKeHiF23wN                                                                                                                                                                                                      |   | X |   |   |   |
| 273 | MY FRENCH PROJECT IS BASICALLY ME HATING MY CHEM TEACHER                                                                                                                                                                                                                                                                                         |   |   | X |   |   |
| 274 | started my career as a student teacher at NHS. They were Jrs. and composed the majority of my Chem classes. #old                                                                                                                                                                                                                                 |   |   |   | X |   |

|     |                                                                                                                                               |   |   |   |   |
|-----|-----------------------------------------------------------------------------------------------------------------------------------------------|---|---|---|---|
|     | <a href="http://t.co/6xY8UVDguR">http://t.co/6xY8UVDguR</a>                                                                                   |   |   |   |   |
| 275 | I actually learned something in chemistry today! April fools we don't have a teacher.                                                         |   | X |   |   |
| 276 | u would think that at UPenn teaching school they would teach my chem teacher not to just make students copy out of the textbook but           |   |   | X |   |
| 277 | [Name redacted] omg wow just remembered how I got that "No Horseplay in Lab" poster from my high school Chem teacher. my favorite poster 4evr |   |   | X |   |
| 278 | No one cares if you're a chemistry teacher!!! #ASMhealth                                                                                      |   |   | X |   |
| 279 | [Name redacted] [Name redacted] lucky my chem teacher doesn't teach me anything                                                               |   |   |   | X |
| 280 | my chem teacher wore pink on a Wednesday just so he can make a mean girls referene #priorities                                                |   |   | X |   |
| 281 | Soooo by Wednesday all my final grades will be posted and I'm really praying for my Chemistry teacher to curve the tests                      |   |   | X |   |
| 282 | will my chem teacher ever reply to my email and round my grade up .4%?                                                                        |   |   | X |   |
| 283 | eleventh grade chem the teacher never learned to say my name right. the class corrected him the first time few times, but id given up long a  |   |   | X |   |
| 284 | I wanna find my old high school chem teacher and walk up to her with my degree like I TOLDDED YOU THE DEVIL IS A LIAR!                        |   |   | X |   |
| 285 | it'd be cool if I had a chem teacher that could actually teach                                                                                | X |   | X |   |
| 286 | I'm an extremely overqualified high school chemistry teacher.                                                                                 |   |   | X |   |
| 287 | my chem teacher emailed my mom a bunch of things for me to do while we had the snow storm.... just me...                                      |   |   | X |   |
| 288 | So my Chem review is in my binder, and the teacher is grading our binders.. S/O                                                               |   |   |   | X |
| 289 | I had to wait an hour at after school tutorial just to ask my Chemistry teacher one question. He was helping so many other people.            |   |   | X |   |
| 290 | "The only thing I have going for me in life is knowing the molecular formula for Tolene" -my Chem teacher                                     |   |   | X |   |
| 291 | My chemistry teacher [Name redacted] me wtf <a href="http://t.co/EFxDaGpJgL">http://t.co/EFxDaGpJgL</a>                                       |   |   |   | X |
| 292 | My chemistry teacher is so wrong for having us finish the rest of this packet for homework                                                    |   |   | X |   |
